# Supplementary material for: The Identification of Admixture Patterns Could Refine Pharmacogenetic Counseling: Analysis of a Population-Based Sample in Mexico
Source: Front Pharmacol. 2020 Apr 22;11:324. doi: 10.3389/fphar.2020.00324 (PMC7188951; doi:10.3389/fphar.2020.00324)
Supplement: Supplementary File 1 — Variants filtered-out during quality controls steps. [file Table_1.xlsx]

## Sheet: Rarevariants
SNV	Chr	Bp	Gene
exm15227	1	11850750	MTHFR	SNV	Single-nucleotide variant/PsychArray code
exm15236	1	11850927	MTHFR	Chr	Chromosome
exm2249735	1	11851297	MTHFR	Bp	Base pair based in hg19 coordinates.
exm15254	1	11852411	MTHFR	Gene	Annotated gene
exm15255	1	11852412	MTHFR
exm-rs17375901	1	11852516	MTHFR
exm15262	1	11854076	MTHFR
exm15263	1	11854085	MTHFR
exm15264	1	11854086	MTHFR
exm15270	1	11854429	MTHFR	On this spreadsheet you will find the codes and genetic coordinates of filtered variants, Rarevariants sheet (MAF < 0.05); Monomorphic sheet (MAF == 1.0) and Non-callfilter sheet (geno < 95%).
exm15285	1	11854790	MTHFR
newrs121434296	1	11854823	MTHFR
exm15296	1	11855248	MTHFR
exm15298	1	11855279	MTHFR
newrs147750177	1	11855351	MTHFR
exm15306	1	11855398	MTHFR
exm15319	1	11856376	MTHFR
exm15334	1	11861298	MTHFR
exm1704558	1	11863038	MTHFR
exm16171	1	12251141	TNFRSF1B
exm16177	1	12251902	TNFRSF1B
exm16191	1	12252927	TNFRSF1B
exm16195	1	12252981	TNFRSF1B
exm16200	1	12253062	TNFRSF1B
exm16205	1	12253143	TNFRSF1B
exm16206	1	12254015	TNFRSF1B
exm16210	1	12254659	TNFRSF1B
exm2230952	1	12262042	TNFRSF1B
psy_rs525672	1	29141967	OPRD1
psy_rs411340	1	29172388	OPRD1
chr1_29189302	1	29189302	OPRD1
exm2233139	1	29189469	OPRD1
exm2233140	1	29189487	OPRD1
exm48350	1	40124804	NT5C1A
exm48359	1	40124935	NT5C1A
exm48365	1	40125077	NT5C1A
variant.2615	1	40129002	NT5C1A
variant.2616	1	40129057	NT5C1A
exm48393	1	40131295	NT5C1A
exm48397	1	40131787	NT5C1A
exm70251	1	78958457	PTGFR
indel.4400	1	78958518	PTGFR
exm2233850	1	78958628	PTGFR
exm70261	1	78958691	PTGFR
exm70265	1	78958862	PTGFR
exm70270	1	78958893	PTGFR
indel.4401	1	78958911	PTGFR
exm70281	1	78959117	PTGFR
exm70293	1	78963581	PTGFR
var_1_79002214	1	79002214	PTGFR
exm70307	1	79002304	PTGFR
kgp24779459	1	97543470	DPYD
rs17470762	1	97543632	DPYD
kgp25082977	1	97543749	DPYD
exm76928	1	97544543	DPYD
exm76930	1	97544549	DPYD
exm76933	1	97544612	DPYD
rs1801268	1	97544627	DPYD
exm76936	1	97544632	DPYD
exm76937	1	97544695	DPYD
exm76940	1	97547947	DPYD
variant.5099	1	97548027	DPYD
rs290807	1	97552243	DPYD
rs6667364	1	97553007	DPYD
exm76952	1	97564154	DPYD
exm76953	1	97564155	DPYD
psy_rs10218636	1	97570985	DPYD
psy_rs141761015	1	97596343	DPYD
variant.5101	1	97700521	DPYD
newrs56005131	1	97700547	DPYD
rs1520668	1	97735667	DPYD
psy_rs142444049	1	97742655	DPYD
rs6692946	1	97748929	DPYD
variant.5104	1	97770839	DPYD
exm76966	1	97770919	DPYD
kgp9376732	1	97770920	DPYD
exm76967	1	97770920	DPYD
seq_chr1_97771751	1	97771751	DPYD
exm76971	1	97771751	DPYD
exm76973	1	97771825	DPYD
exm76976	1	97771841	DPYD
psy_rs115644251	1	97773324	DPYD
psy_rs76431772	1	97790135	DPYD
psy_rs115332211	1	97792597	DPYD
psy_rs75267292	1	97801307	DPYD
psy_rs144883827	1	97810086	DPYD
rs12124566	1	97830899	DPYD
rs1879372	1	97833918	DPYD
psy_rs139090364	1	97844018	DPYD
exm76982	1	97848017	DPYD
psy_rs116620462	1	97869006	DPYD
psy_rs58941846	1	97883401	DPYD
variant.5107	1	97915610	DPYD
exm76983	1	97915614	DPYD
exm76984	1	97915615	DPYD
exm76986	1	97915655	DPYD
psy_rs79206631	1	97929998	DPYD
SNP115	1	97981343	DPYD
exm76999	1	97981343	DPYD
exm77004	1	97981407	DPYD
exm77005	1	97981421	DPYD
psy_rs17368985	1	98010949	DPYD
kgp15885871	1	98015146	DPYD
newrs72549304	1	98015165	DPYD
kgp24842837	1	98015269	DPYD
exm77019	1	98015282	DPYD
exm77021	1	98015291	DPYD
rs12060391	1	98019997	DPYD
exm77026	1	98039375	DPYD
exm77028	1	98039395	DPYD
kgp8738400	1	98039419	DPYD
exm77031	1	98039426	DPYD
exm77032	1	98039437	DPYD
exm1956973	1	98058782	DPYD
variant.5114	1	98058832	DPYD
hCV32294341	1	98058899	DPYD
psy_rs2786501	1	98075725	DPYD
psy_rs75659087	1	98080755	DPYD
psy_rs17369442	1	98085570	DPYD
psy_rs114479539	1	98099718	DPYD
psy_rs12070513	1	98102187	DPYD
psy_rs75314491	1	98103177	DPYD
psy_rs79385582	1	98109889	DPYD
psy_rs76277277	1	98118436	DPYD
rs13375516	1	98126717	DPYD
rs2151563	1	98143266	DPYD
exm77051	1	98144726	DPYD
variant.5117	1	98157272	DPYD
rs1801266	1	98157332	DPYD
newrs146170505	1	98164926	DPYD
kgp15335138	1	98164948	DPYD
exm77059	1	98165030	DPYD
exm77065	1	98165091	DPYD
psy_rs61790063	1	98173801	DPYD
kgp25180083	1	98185357	DPYD
rs2151562	1	98185527	DPYD
kgp12369057	1	98185700	DPYD
rs1333718	1	98186077	DPYD
kgp15897099	1	98186118	DPYD
kgp2286066	1	98186229	DPYD
variant.5122	1	98187061	DPYD
exm77072	1	98187098	DPYD
rs4304627	1	98187755	DPYD
rs17378455	1	98194845	DPYD
psy_rs74108303	1	98212797	DPYD
psy_rs74108305	1	98218887	DPYD
psy_rs76593957	1	98246494	DPYD
rs13376217	1	98265943	DPYD
newrs189768576	1	98293683	DPYD
newrs141597515	1	98293695	DPYD
psy_rs75641275	1	98327133	DPYD
psy_rs113411628	1	98335991	DPYD
psy_rs111983855	1	98347353	DPYD
variant.5127	1	98348820	DPYD
pgxUn0003	1	98348908	DPYD
psy_rs139027552	1	98376461	DPYD
psy_rs75570956	1	98377149	DPYD
rs12068997	1	110230836	GSTM1
exm2230743	1	110233104	GSTM1
exm81898	1	110233115	GSTM1
exm-rs4434872	1	153774276
psy_rs147483024	1	154540865	CHRNB2
exm104520	1	154541950	CHRNB2
exm104578	1	154548277	CHRNB2
exm104580	1	154548331	CHRNB2
rs3811450	1	154551032	CHRNB2
exm106682	1	155279627	FDPS
exm106685	1	155279722	FDPS
var_1_155279854	1	155279854	FDPS
exm106694	1	155282065	FDPS
exm1717397	1	155288061	FDPS
exm106707	1	155289424	FDPS
exm106714	1	155290231	FDPS
indel.7752	1	159272174	FCER1A
exm114133	1	159272209	FCER1A
exm114143	1	159273892	FCER1A
exm114144	1	159273943	FCER1A
exm114148	1	159275786	FCER1A
exm114153	1	159275976	FCER1A
exm114164	1	159277672	FCER1A
exm114165	1	159277673	FCER1A
exm114166	1	159277682	FCER1A
exm114168	1	159277689	FCER1A
exm114171	1	159277709	FCER1A
variant.8037	1	161475315	FCGR2A
newrs148134119	1	161475798	FCGR2A
exm117930	1	161479708	FCGR2A
exm117932	1	161479732	FCGR2A
exm118068	1	161512848	FCGR3A
exm118082	1	161514566	FCGR3A
exm118116	1	161518437	FCGR3A
rs12074902	1	162067447	NOS1AP
rs16857019	1	162112650	NOS1AP
psy_rs111479527	1	162178982	NOS1AP
psy_rs17460657	1	162261826	NOS1AP
exm118761	1	162270463	NOS1AP
exm2250095	1	162302846	NOS1AP
rs6700867	1	162306295	NOS1AP
exm118790	1	162326843	NOS1AP
psy_rs115298183	1	162333324	NOS1AP
exm118810	1	162336953	NOS1AP
variant.8276	1	169483622	F5
exm121684	1	169483672	F5
exm121699	1	169487673	F5
exm121715	1	169494140	F5
variant.8279	1	169495162	F5
exm1733727	1	169497194	F5
exm121732	1	169497306	F5
newrs141977229	1	169497306	F5
variant.8282	1	169498919	F5
exm121745	1	169499000	F5
exm121746	1	169499020	F5
exm121750	1	169500056	F5
indel.8285	1	169500111	F5
exm121765	1	169505880	F5
exm121773	1	169509698	F5
exm121775	1	169509739	F5
exm121844	1	169510890	F5
exm2231785	1	169510926	F5
exm121847	1	169510964	F5
exm121848	1	169511003	F5
exm121855	1	169511117	F5
exm121862	1	169511389	F5
variant.8288	1	169511390	F5
exm121867	1	169511422	F5
exm121868	1	169511429	F5
exm121873	1	169511464	F5
exm121877	1	169511522	F5
exm121881	1	169511576	F5
exm121907	1	169511903	F5
exm121912	1	169511989	F5
1KG_1_169512078	1	169512078	F5
exm121924	1	169512109	F5
exm121929	1	169512199	F5
exm2231787	1	169512296	F5
variant.8291	1	169512296	F5
exm121936	1	169512319	F5
rs1018827	1	169514006	F5
exm121962	1	169519086	F5
exm121969	1	169519883	F5
exm121983	1	169524432	F5
exm121985	1	169524517	F5
exm121989	1	169524542	F5
variant.8296	1	169525925	F5
exm122008	1	169528493	F5
exm122012	1	169529812	F5
exm122015	1	169529840	F5
exm122022	1	169529974	F5
exm122025	1	169541513	F5
variant.8299	1	169541549	F5
exm122035	1	169555519	F5
exm122036	1	169555582	F5
exm136174	1	201009011	CACNA1S
exm136179	1	201009066	CACNA1S
exm136180	1	201009071	CACNA1S
exm136194	1	201012449	CACNA1S
exm136201	1	201012484	CACNA1S
exm136202	1	201012485	CACNA1S
exm136203	1	201012503	CACNA1S
exm136215	1	201013506	CACNA1S
exm136216	1	201013535	CACNA1S
exm136219	1	201013548	CACNA1S
exm136255	1	201020164	CACNA1S
exm136256	1	201020165	CACNA1S
exm136270	1	201021733	CACNA1S
exm136275	1	201022387	CACNA1S
exm136279	1	201022587	CACNA1S
exm136285	1	201023671	CACNA1S
variant.9244	1	201027536	CACNA1S
exm136297	1	201029794	CACNA1S
exm136321	1	201031133	CACNA1S
exm136324	1	201031168	CACNA1S
exm136348	1	201036117	CACNA1S
exm136350	1	201038610	CACNA1S
exm136354	1	201038650	CACNA1S
exm2232205	1	201038709	CACNA1S
chr1_201042706	1	201042706	CACNA1S
chr1_201042712	1	201042712	CACNA1S
chr1_201042718	1	201042718	CACNA1S
chr1_201042724	1	201042724	CACNA1S
exm136370	1	201042735	CACNA1S
chr1_201042745	1	201042745	CACNA1S
chr1_201042748	1	201042748	CACNA1S
chr1_201042751	1	201042751	CACNA1S
chr1_201043635	1	201043635	CACNA1S
exm136374	1	201043649	CACNA1S
exm136375	1	201043650	CACNA1S
chr1_201043653	1	201043653	CACNA1S
chr1_201043659	1	201043659	CACNA1S
chr1_201043662	1	201043662	CACNA1S
chr1_201043695	1	201043695	CACNA1S
chr1_201043701	1	201043701	CACNA1S
var_1_201044622	1	201044622	CACNA1S
chr1_201044657	1	201044657	CACNA1S
exm136390	1	201044682	CACNA1S
chr1_201044723	1	201044723	CACNA1S
chr1_201044731	1	201044731	CACNA1S
exm136400	1	201046058	CACNA1S
exm136403	1	201046098	CACNA1S
chr1_201046104	1	201046104	CACNA1S
chr1_201046113	1	201046113	CACNA1S
exm136404	1	201046164	CACNA1S
exm136407	1	201046205	CACNA1S
chr1_201046244	1	201046244	CACNA1S
chr1_201046249	1	201046249	CACNA1S
chr1_201047008	1	201047008	CACNA1S
chr1_201047017	1	201047017	CACNA1S
chr1_201047039	1	201047039	CACNA1S
chr1_201047079	1	201047079	CACNA1S
exm136416	1	201047079	CACNA1S
chr1_201047083	1	201047083	CACNA1S
chr1_201047098	1	201047098	CACNA1S
chr1_201047123	1	201047123	CACNA1S
exm2275531	1	201047133	CACNA1S
chr1_201047194	1	201047194	CACNA1S
exm1746012	1	201047231	CACNA1S
chr1_201052329	1	201052329	CACNA1S
exm136445	1	201052382	CACNA1S
chr1_201052408	1	201052408	CACNA1S
chr1_201052432	1	201052432	CACNA1S
chr1_201052441	1	201052441	CACNA1S
chr1_201052449	1	201052449	CACNA1S
chr1_201054099	1	201054099	CACNA1S
chr1_201054112	1	201054112	CACNA1S
chr1_201054124	1	201054124	CACNA1S
chr1_201054142	1	201054142	CACNA1S
exm136451	1	201054144	CACNA1S
chr1_201054147	1	201054147	CACNA1S
chr1_201054157	1	201054157	CACNA1S
exm136453	1	201054159	CACNA1S
chr1_201054564	1	201054564	CACNA1S
chr1_201054567	1	201054567	CACNA1S
chr1_201054579	1	201054579	CACNA1S
chr1_201054594	1	201054594	CACNA1S
exm136457	1	201054602	CACNA1S
chr1_201054651	1	201054651	CACNA1S
chr1_201054672	1	201054672	CACNA1S
chr1_201054681	1	201054681	CACNA1S
chr1_201054687	1	201054687	CACNA1S
chr1_201054690	1	201054690	CACNA1S
chr1_201054696	1	201054696	CACNA1S
chr1_201054699	1	201054699	CACNA1S
chr1_201054708	1	201054708	CACNA1S
chr1_201056997	1	201056997	CACNA1S
chr1_201057025	1	201057025	CACNA1S
chr1_201057036	1	201057036	CACNA1S
exm136465	1	201058386	CACNA1S
chr1_201058386	1	201058386	CACNA1S
exm136467	1	201058391	CACNA1S
chr1_201058404	1	201058404	CACNA1S
chr1_201058409	1	201058409	CACNA1S
chr1_201058412	1	201058412	CACNA1S
chr1_201058422	1	201058422	CACNA1S
chr1_201058491	1	201058491	CACNA1S
chr1_201058503	1	201058503	CACNA1S
exm136477	1	201058513	CACNA1S
chr1_201058551	1	201058551	CACNA1S
chr1_201058558	1	201058558	CACNA1S
chr1_201058565	1	201058565	CACNA1S
chr1_201058568	1	201058568	CACNA1S
chr1_201058574	1	201058574	CACNA1S
chr1_201060784	1	201060784	CACNA1S
chr1_201060792	1	201060792	CACNA1S
chr1_201060801	1	201060801	CACNA1S
chr1_201060816	1	201060816	CACNA1S
exm136494	1	201061111	CACNA1S
chr1_201061111	1	201061111	CACNA1S
chr1_201061139	1	201061139	CACNA1S
chr1_201061157	1	201061157	CACNA1S
exm136497	1	201061160	CACNA1S
chr1_201061165	1	201061165	CACNA1S
chr1_201061175	1	201061175	CACNA1S
chr1_201061220	1	201061220	CACNA1S
exm136501	1	201063025	CACNA1S
chr1_201063098	1	201063098	CACNA1S
chr1_201063110	1	201063110	CACNA1S
chr1_201063115	1	201063115	CACNA1S
chr1_201063140	1	201063140	CACNA1S
chr1_201079324	1	201079324	CACNA1S
exm136514	1	201079344	CACNA1S
chr1_201079377	1	201079377	CACNA1S
chr1_201079390	1	201079390	CACNA1S
psy_rs111530734	1	201079532	CACNA1S
chr1_201081318	1	201081318	CACNA1S
chr1_201081323	1	201081323	CACNA1S
chr1_201081336	1	201081336	CACNA1S
chr1_201081359	1	201081359	CACNA1S
chr1_201081369	1	201081369	CACNA1S
chr1_201081376	1	201081376	CACNA1S
chr1_201081404	1	201081404	CACNA1S
chr1_201081416	1	201081416	CACNA1S
chr1_201081419	1	201081419	CACNA1S
chr1_201081425	1	201081425	CACNA1S
chr1_201081431	1	201081431	CACNA1S
chr1_201081443	1	201081443	CACNA1S
variant.9255	1	201081449	CACNA1S
chr1_201081464	1	201081464	CACNA1S
kgp15267080	1	209859620	HSD11B1
rs13306421	1	209878286	HSD11B1
1KG_1_209879176	1	209879176	HSD11B1
kgp15549310	1	209879184	HSD11B1
kgp2845044	1	209879232	HSD11B1
kgp15808422	1	209908025	HSD11B1
kgp15328133	1	225997826	EPHX1
rs3738039	1	226013037	EPHX1
kgp25084949	1	226013072	EPHX1
variant.10296	1	226016531	EPHX1
exm152977	1	226016551	EPHX1
kgp25117122	1	226016558	EPHX1
exm152979	1	226016575	EPHX1
rs2234698	1	226019500	EPHX1
exm152986	1	226019508	EPHX1
kgp15304712	1	226019508	EPHX1
kgp25017445	1	226019527	EPHX1
exm152988	1	226019542	EPHX1
exm153002	1	226026377	EPHX1
exm2232609	1	226026405	EPHX1
exm153011	1	226026513	EPHX1
exm153012	1	226026573	EPHX1
exm153020	1	226027029	EPHX1
kgp3413831	1	226027548	EPHX1
kgp15134038	1	226027569	EPHX1
kgp3917924	1	226027575	EPHX1
exm153025	1	226027575	EPHX1
exm1764694	1	226027630	EPHX1
kgp25126874	1	226027630	EPHX1
exm153035	1	226027735	EPHX1
rs1051741	1	226032229	EPHX1
rs2137841	1	226032319	EPHX1
kgp15622455	1	226032896	EPHX1
exm153048	1	226032903	EPHX1
kgp15452835	1	226032928	EPHX1
rs4149229	1	226032928	EPHX1
exm153052	1	226032962	EPHX1
exm153058	1	226033041	EPHX1
rs7906180	10	19921103	MALRD1
psy_rs139287929	10	96527672	CYP2C19
exm843895	10	96534863	CYP2C19
exm843896	10	96534887	CYP2C19
kgp7668749	10	96534922	CYP2C19
variant.13845	10	96534977	CYP2C19
variant.13846	10	96534982	CYP2C19
kgp29673168	10	96535152	CYP2C19
exm843903	10	96535173	CYP2C19
newrs4986893	10	96540410	CYP2C19
exm843929	10	96540410	CYP2C19
exm843930	10	96541615	CYP2C19
kgp21995418	10	96580336	CYP2C19
variant.13853	10	96580399	CYP2C19
kgp21942249	10	96602691	CYP2C19
exm843958	10	96609752	CYP2C19
SNP50	10	96612495	CYP2C19
exm843975	10	96612671	CYP2C19
exm843980	10	96698453	CYP2C9
rs12414460	10	96701988	CYP2C9
exm844029	10	96708974	CYP2C9
kgp21755054	10	96708974	CYP2C9
rs9332131	10	96709039	CYP2C9
exm844034	10	96731876	CYP2C9
exm-rs10509680	10	96734339	CYP2C9
kgp22009765	10	96740981	CYP2C9
SNP66	10	96741054	CYP2C9
kgp21943453	10	96741058	CYP2C9
exm844050	10	96741066	CYP2C9
exm844054	10	96741124	CYP2C9
exm2249447	10	96741124	CYP2C9
variant.13860	10	96741128	CYP2C9
rs2017319	10	96748635	CYP2C9
exm844070	10	96748733	CYP2C9
variant.13861	10	96748741	CYP2C9
exm844073	10	96748777	CYP2C9
kgp22034059	10	96748852	CYP2C9
kgp21913328	10	96748873	CYP2C9
rs9332244	10	96749005	CYP2C9
kgp29854121	10	96796796	CYP2C8
1KG_10_96796973	10	96796973	CYP2C8
exm844087	10	96797033	CYP2C8
exm844093	10	96798695	CYP2C8
kgp22047705	10	96798715	CYP2C8
exm844102	10	96798795	CYP2C8
variant.13863	10	96802642	CYP2C8
exm844109	10	96802703	CYP2C8
rs11188150	10	96802737	CYP2C8
exm844115	10	96802768	CYP2C8
exm844121	10	96805707	CYP2C8
exm2217697	10	96805708	CYP2C8
rs11572103	10	96818106	CYP2C8
exm844133	10	96818119	CYP2C8
exm844138	10	96818181	CYP2C8
variant.13867	10	96824552	CYP2C8
newrs146962089	10	96824564	CYP2C8
exm844148	10	96824597	CYP2C8
exm844149	10	96824618	CYP2C8
exm844150	10	96824643	CYP2C8
exm844152	10	96824658	CYP2C8
variant.13871	10	96826960	CYP2C8
exm844157	10	96826966	CYP2C8
rs11572076	10	96827150	CYP2C8
variant.13874	10	96827281	CYP2C8
variant.13876	10	96827284	CYP2C8
indel.13875	10	96827285	CYP2C8
variant.13877	10	96827303	CYP2C8
exm844184	10	96829159	CYP2C8
kgp21944904	10	96829245	CYP2C8
exm852837	10	104849450	NT5C2
exm852842	10	104849496	NT5C2
newrs140984378	10	104849548	NT5C2
indel.14424	10	104850727	NT5C2
psy_rs72843998	10	104855261	NT5C2
psy_rs77593808	10	104856100	NT5C2
exm1669803	10	104858719	NT5C2
exm852890	10	104899197	NT5C2
exm855847	10	112838337	ADRA2A
exm855867	10	112838989	ADRA2A
exm856277	10	114724358	TCF7L2
variant.14627	10	114799886	TCF7L2
rs7907632	10	114817236	TCF7L2
exm856286	10	114849211	TCF7L2
variant.14629	10	114910882	TCF7L2
exm856330	10	114925441	TCF7L2
exm856347	10	114925615	TCF7L2
exm856350	10	114925628	TCF7L2
exm856354	10	114925675	TCF7L2
kgp5418137	10	135340868	CYP2E1
exm1675891	10	135342034	CYP2E1
kgp29806682	10	135342101	CYP2E1
exm868732	10	135345127	CYP2E1
exm868742	10	135345633	CYP2E1
exm868746	10	135345657	CYP2E1
indel.15437	10	135345674	CYP2E1
exm868747	10	135345675	CYP2E1
exm1675899	10	135345697	CYP2E1
kgp21896191	10	135345752	CYP2E1
kgp1074564	10	135347397	CYP2E1
exm868786	10	135351264	CYP2E1
SNP127	10	135351264	CYP2E1
exm868788	10	135351285	CYP2E1
exm868796	10	135352356	CYP2E1
kgp21973149	10	135352520	CYP2E1
exm891038	11	11292768	GALNT18
exm1694931	11	11314582	GALNT18
exm891051	11	11314653	GALNT18
exm2217978	11	11348640	GALNT18
exm891059	11	11348660	GALNT18
indel.16803	11	11348716	GALNT18
rs901554	11	11354393	GALNT18
psy_rs116860983	11	11355800	GALNT18
exm891076	11	11362458	GALNT18
exm2259697	11	11367614	GALNT18
rs4243927	11	11373925	GALNT18
psy_rs78975035	11	11393386	GALNT18
exm891104	11	11398738	GALNT18
exm891112	11	11400647	GALNT18
exm891132	11	11470353	GALNT18
rs7940423	11	11504228	GALNT18
kgp23118405	11	17408090	KCNJ11
kgp12869467	11	17408254	KCNJ11
exm893223	11	17408485	KCNJ11
exm2249718	11	17408496	KCNJ11
exm893236	11	17408605	KCNJ11
exm893246	11	17408831	KCNJ11
exm893254	11	17409055	KCNJ11
exm893256	11	17409071	KCNJ11
exm893259	11	17409113	KCNJ11
exm893275	11	17409602	KCNJ11
exm906354	11	48238704	OR4B1
variant.18801	11	62744274	SLC22A6
exm920101	11	62744339	SLC22A6
kgp12702291	11	62744751	SLC22A6
exm920109	11	62744798	SLC22A6
exm920133	11	62748795	SLC22A6
rs11568624	11	62749344	SLC22A6
exm920139	11	62751069	SLC22A6
kgp7385301	11	62751812	SLC22A6
rs11568627	11	62751852	SLC22A6
exm920149	11	62751957	SLC22A6
exm920155	11	62752003	SLC22A6
exm920157	11	62752014	SLC22A6
kgp22811941	11	62752259	SLC22A6
kgp7575934	11	62752440	SLC22A6
kgp12777014	11	62760748	SLC22A8
exm920169	11	62760800	SLC22A8
exm920178	11	62761083	SLC22A8
exm920185	11	62762124	SLC22A8
kgp2826482	11	62763226	SLC22A8
exm920205	11	62763264	SLC22A8
var_11_62763496	11	62763496	SLC22A8
rs11568492	11	62763557	SLC22A8
psy_rs77418486	11	62765313	SLC22A8
rs11568496	11	62766439	SLC22A8
exm920220	11	62766475	SLC22A8
exm920226	11	62766540	SLC22A8
exm920228	11	62766561	SLC22A8
exm920231	11	62767214	SLC22A8
exm920232	11	62767231	SLC22A8
rs11568479	11	62768242	SLC22A8
exm1726268	11	62782258	SLC22A8
kgp7230102	11	62782278	SLC22A8
kgp12847096	11	62782350	SLC22A8
exm920248	11	62782405	SLC22A8
exm922853	11	64323476	SLC22A11
kgp12579486	11	64323507	SLC22A11
exm922862	11	64323607	SLC22A11
exm922863	11	64323613	SLC22A11
exm922865	11	64323656	SLC22A11
kgp22997526	11	64329527	SLC22A11
exm922898	11	64329582	SLC22A11
exm922904	11	64329781	SLC22A11
exm922906	11	64329804	SLC22A11
exm922910	11	64329823	SLC22A11
exm922914	11	64331790	SLC22A11
exm922919	11	64331830	SLC22A11
exm922925	11	64332766	SLC22A11
exm922927	11	64332779	SLC22A11
variant.18998	11	64336209	SLC22A11
exm922959	11	64338485	SLC22A11
kgp13023297	11	64338586	SLC22A11
kgp12680289	11	64358560	SLC22A12
kgp1098435	11	64358795	SLC22A12
exm-rs12800450	11	64359221	SLC22A12
exm922986	11	64359419	SLC22A12
exm1727699	11	64360260	SLC22A12
exm922995	11	64360978	SLC22A12
exm922999	11	64361122	SLC22A12
exm2274496	11	64361124	SLC22A12
exm1727705	11	64361219	SLC22A12
exm923010	11	64366298	SLC22A12
exm923015	11	64367152	SLC22A12
exm923018	11	64367239	SLC22A12
exm923022	11	64367300	SLC22A12
exm923031	11	64367853	SLC22A12
exm923032	11	64367854	SLC22A12
exm923037	11	64367902	SLC22A12
exm2275241	11	64368207	SLC22A12
exm923042	11	64368239	SLC22A12
exm923045	11	64368272	SLC22A12
exm923057	11	64368973	SLC22A12
rs8191444	11	67351624	GSTP1
exm933748	11	67351964	GSTP1
exm933755	11	67352183	GSTP1
exm933757	11	67352192	GSTP1
rs1138272	11	67353579	GSTP1
exm933771	11	67353654	GSTP1
rs4986949	11	67353677	GSTP1
GA028194	11	67354122	GSTP1
kgp5714134	11	74862391	SLCO2B1
exm941360	11	74873700	SLCO2B1
exm941361	11	74873726	SLCO2B1
exm941377	11	74876878	SLCO2B1
exm941379	11	74876889	SLCO2B1
rs1109407	11	74876951	SLCO2B1
exm2219457	11	74880266	SLCO2B1
kgp2308424	11	74880357	SLCO2B1
exm941400	11	74880370	SLCO2B1
exm941417	11	74883495	SLCO2B1
exm941420	11	74883559	SLCO2B1
kgp13023084	11	74883599	SLCO2B1
exm941424	11	74883614	SLCO2B1
exm941425	11	74899221	SLCO2B1
exm941436	11	74904362	SLCO2B1
exm941451	11	74904599	SLCO2B1
exm941458	11	74907651	SLCO2B1
exm941466	11	74911307	SLCO2B1
exm941469	11	74911311	SLCO2B1
newrs186131685	11	74914042	SLCO2B1
psy_rs142805001	11	74915246	SLCO2B1
exm941497	11	74915566	SLCO2B1
exm941498	11	74915572	SLCO2B1
kgp12810251	11	74915586	SLCO2B1
kgp22870537	11	74916164	SLCO2B1
kgp4375382	11	74916346	SLCO2B1
kgp8024109	11	74916487	SLCO2B1
kgp464842	11	74916773	SLCO2B1
kgp12734637	11	74916823	SLCO2B1
exm951672	11	102984387	DYNC2H1
exm951676	11	102985957	DYNC2H1
exm1692542	11	102985987	DYNC2H1
exm1692551	11	102988361	DYNC2H1
exm951684	11	102988504	DYNC2H1
exm951685	11	102988506	DYNC2H1
exm951689	11	102991183	DYNC2H1
exm951692	11	102991467	DYNC2H1
exm951694	11	102991668	DYNC2H1
var_11_102992106	11	102992106	DYNC2H1
exm951701	11	102992107	DYNC2H1
exm951705	11	102992209	DYNC2H1
exm951706	11	102992224	DYNC2H1
exm951713	11	102993717	DYNC2H1
variant.20947	11	102993734	DYNC2H1
exm951714	11	102995941	DYNC2H1
exm951726	11	103006228	DYNC2H1
exm951738	11	103006582	DYNC2H1
exm951739	11	103006585	DYNC2H1
exm951752	11	103019260	DYNC2H1
exm951753	11	103019336	DYNC2H1
variant.20949	11	103024080	DYNC2H1
exm951762	11	103024104	DYNC2H1
exm951763	11	103024105	DYNC2H1
exm951764	11	103024116	DYNC2H1
exm2249523	11	103025261	DYNC2H1
exm951768	11	103025296	DYNC2H1
exm951774	11	103026093	DYNC2H1
exm951777	11	103026168	DYNC2H1
exm951782	11	103027166	DYNC2H1
exm951785	11	103027246	DYNC2H1
exm951790	11	103027445	DYNC2H1
exm951807	11	103033841	DYNC2H1
exm951810	11	103036743	DYNC2H1
exm951816	11	103039637	DYNC2H1
exm951821	11	103040915	DYNC2H1
exm951836	11	103043919	DYNC2H1
exm951837	11	103043925	DYNC2H1
exm951838	11	103043949	DYNC2H1
exm951847	11	103044867	DYNC2H1
exm951849	11	103046984	DYNC2H1
exm951860	11	103048457	DYNC2H1
variant.20953	11	103048549	DYNC2H1
exm951870	11	103049922	DYNC2H1
rs11225584	11	103052558	DYNC2H1
exm951877	11	103055698	DYNC2H1
exm951887	11	103057106	DYNC2H1
exm951905	11	103059283	DYNC2H1
exm951908	11	103059307	DYNC2H1
exm951915	11	103060427	DYNC2H1
exm951922	11	103062861	DYNC2H1
exm1692679	11	103068689	DYNC2H1
exm951936	11	103070084	DYNC2H1
variant.20957	11	103070831	DYNC2H1
variant.20958	11	103070832	DYNC2H1
indel.20960	11	103074477	DYNC2H1
exm951946	11	103074487	DYNC2H1
exm951947	11	103075604	DYNC2H1
exm951948	11	103075609	DYNC2H1
exm951965	11	103086537	DYNC2H1
exm951969	11	103090692	DYNC2H1
exm951975	11	103091449	DYNC2H1
exm951977	11	103092809	DYNC2H1
exm951979	11	103093716	DYNC2H1
exm951983	11	103093811	DYNC2H1
variant.20963	11	103104887	DYNC2H1
exm951992	11	103107198	DYNC2H1
exm951995	11	103107263	DYNC2H1
exm951996	11	103114467	DYNC2H1
exm952004	11	103124019	DYNC2H1
1KG_11_103124075	11	103124075	DYNC2H1
indel.20964	11	103124114	DYNC2H1
exm952016	11	103126969	DYNC2H1
exm952020	11	103128425	DYNC2H1
exm952021	11	103128448	DYNC2H1
exm952023	11	103130659	DYNC2H1
psy_rs117694808	11	103138798	DYNC2H1
variant.20967	11	103151110	DYNC2H1
exm952034	11	103153758	DYNC2H1
indel.20968	11	103157009	DYNC2H1
exm952042	11	103157059	DYNC2H1
exm952050	11	103173911	DYNC2H1
exm952061	11	103191758	DYNC2H1
exm952062	11	103191820	DYNC2H1
exm952063	11	103191854	DYNC2H1
exm952068	11	103191937	DYNC2H1
exm952075	11	103194686	DYNC2H1
exm952080	11	103229013	DYNC2H1
variant.20972	11	103229039	DYNC2H1
rs12786254	11	103249230	DYNC2H1
psy_rs7924386	11	103261127	DYNC2H1
exm952089	11	103270488	DYNC2H1
exm952100	11	103326008	DYNC2H1
exm952104	11	103327079	DYNC2H1
exm952110	11	103349890	DYNC2H1
exm952111	11	103349922	DYNC2H1
exm952114	11	103349966	DYNC2H1
exm953799	11	108180945	ATM
exm953803	11	108183167	ATM
exm953808	11	108186610	ATM
exm953809	11	108186631	ATM
exm953810	11	108186638	ATM
exm953813	11	108186818	ATM
exm953816	11	108188136	ATM
exm953822	11	108190770	ATM
exm2274528	11	108192078	ATM
exm953829	11	108192118	ATM
exm953837	11	108196896	ATM
variant.21143	11	108196957	ATM
exm953841	11	108198391	ATM
exm953843	11	108198400	ATM
exm953849	11	108199832	ATM
exm953855	11	108200946	ATM
variant.21145	11	108201082	ATM
exm953863	11	108202171	ATM
var_11_108202611	11	108202612	ATM
newrs138941496	11	108203492	ATM
newrs55982963	11	108206576	ATM
variant.21156	11	108213964	ATM
exm953897	11	108216609	ATM
exm953898	11	108216611	ATM
exm953912	11	108235879	ATM
newrs144636562	11	108236072	ATM
exm953921	11	108236150	ATM
exm953930	11	108253814	C11orf65
variant.21166	11	108256646	C11orf65
exm953937	11	108256661	C11orf65
exm953944	11	108264068	C11orf65
variant.21168	11	108277488	C11orf65
exm953951	11	108277509	C11orf65
exm953955	11	108277584	C11orf65
indel.21170	11	108277607	C11orf65
exm953961	11	108277861	C11orf65
exm953962	11	108277873	C11orf65
psy_rs187788035	11	108291333	C11orf65
exm953964	11	108302517	C11orf65
newrs149955947	11	108332229	C11orf65
exm953968	11	108332267	C11orf65
exm956252	11	113258719	ANKK1
exm956254	11	113258762	ANKK1
exm956257	11	113258787	ANKK1
exm956265	11	113264279	ANKK1
exm956272	11	113264382	ANKK1
exm956274	11	113264421	ANKK1
exm956280	11	113265667	ANKK1
exm956285	11	113265724	ANKK1
exm956288	11	113266080	ANKK1
variant.21374	11	113266126	ANKK1
exm956297	11	113266815	ANKK1
exm956298	11	113266816	ANKK1
exm956300	11	113266822	ANKK1
exm1694992	11	113266930	ANKK1
exm956306	11	113266933	ANKK1
exm956308	11	113267947	ANKK1
exm956309	11	113267957	ANKK1
exm956310	11	113267991	ANKK1
exm956311	11	113268050	ANKK1
exm956321	11	113269724	ANKK1
exm956322	11	113269727	ANKK1
exm956324	11	113269742	ANKK1
exm956325	11	113269792	ANKK1
exm956331	11	113269907	ANKK1
exm956336	11	113270024	ANKK1
exm956339	11	113270064	ANKK1
exm956343	11	113270260	ANKK1
exm956347	11	113270369	ANKK1
exm956353	11	113270450	ANKK1
exm956354	11	113270475	ANKK1
exm956355	11	113270478	ANKK1
exm956356	11	113270555	ANKK1
exm956357	11	113270595	ANKK1
exm956360	11	113270660	ANKK1
exm956361	11	113270699	ANKK1
exm956363	11	113270723	ANKK1
chr11_113270770	11	113270770	ANKK1
exm956380	11	113270897	ANKK1
exm956393	11	113283337	DRD2
exm956399	11	113283437	DRD2
exm956405	11	113283484	DRD2
exm956428	11	113287657	DRD2
psy_rs75349786	11	113299273	DRD2
exm-rs11214606	11	113309869	DRD2
psy_rs112646785	11	113315276	DRD2
psy_rs117816894	11	113345566	DRD2
exm957660	11	116660983	APOA5
exm957661	11	116661001	APOA5
exm957668	11	116661101	APOA5
exm957672	11	116661122	APOA5
exm957682	11	116661392	APOA5
exm957687	11	116661488	APOA5
exm957699	11	116661656	APOA5
exm957700	11	116661665	APOA5
exm957708	11	116662344	APOA5
exm957709	11	116662352	APOA5
rs3897570	11	120395229	GRIK4
rs7104057	11	120397672	GRIK4
exm963638	11	120531034	GRIK4
exm963646	11	120531073	GRIK4
exm963649	11	120531096	GRIK4
exm963650	11	120531108	GRIK4
exm963652	11	120673443	GRIK4
exm963654	11	120673477	GRIK4
rs7105205	11	120678019	GRIK4
exm963659	11	120686116	GRIK4
exm963665	11	120690603	GRIK4
exm963666	11	120690618	GRIK4
variant.21856	11	120707554	GRIK4
psy_rs77751729	11	120714261	GRIK4
exm963682	11	120732716	GRIK4
exm963697	11	120744881	GRIK4
exm-rs12797755	11	120809460	GRIK4
exm963727	11	120811161	GRIK4
rs684913	11	120819562	GRIK4
exm963748	11	120827653	GRIK4
exm963750	11	120831733	GRIK4
exm963751	11	120831741	GRIK4
exm963755	11	120833194	GRIK4
exm963758	11	120833231	GRIK4
exm963763	11	120833316	GRIK4
exm963768	11	120837936	GRIK4
exm963775	11	120852890	GRIK4
exm963777	11	120856619	GRIK4
exm965107	11	123476108	GRAMD1B
exm965113	11	123477390	GRAMD1B
exm965124	11	123479372	GRAMD1B
variant.21929	11	123483559	GRAMD1B
exm965144	11	123484247	GRAMD1B
psy_rs113366369	11	123487740	GRAMD1B
variant.21930	11	123489065	GRAMD1B
exm965163	11	123489856	GRAMD1B
exm977213	12	6438963	TNFRSF1A
exm1782276	12	6439013	TNFRSF1A
exm977218	12	6439066	TNFRSF1A
exm977245	12	6442571	TNFRSF1A
newrs104895257	12	6442607	TNFRSF1A
exm977247	12	6442643	TNFRSF1A
exm977252	12	6443001	TNFRSF1A
exm979051	12	6952177	GNB3
exm979059	12	6952237	GNB3
exm1784052	12	6952602	GNB3
exm979068	12	6952645	GNB3
exm979069	12	6952660	GNB3
exm979088	12	6954849	GNB3
exm979090	12	6954864	GNB3
exm979098	12	6954961	GNB3
chr12_13715731	12	13715731	GRIN2B
chr12_13715749	12	13715749	GRIN2B
chr12_13715821	12	13715821	GRIN2B
chr12_13715842	12	13715842	GRIN2B
chr12_13715845	12	13715845	GRIN2B
exm2250716	12	13715861	GRIN2B
chr12_13715877	12	13715877	GRIN2B
chr12_13715926	12	13715926	GRIN2B
chr12_13715928	12	13715928	GRIN2B
exm986498	12	13715932	GRIN2B
chr12_13715968	12	13715968	GRIN2B
chr12_13715982	12	13715982	GRIN2B
chr12_13715984	12	13715984	GRIN2B
chr12_13715989	12	13715989	GRIN2B
chr12_13716022	12	13716022	GRIN2B
chr12_13716045	12	13716045	GRIN2B
chr12_13716115	12	13716115	GRIN2B
chr12_13716151	12	13716151	GRIN2B
exm986509	12	13716178	GRIN2B
chr12_13716187	12	13716187	GRIN2B
chr12_13716193	12	13716193	GRIN2B
chr12_13716232	12	13716232	GRIN2B
chr12_13716235	12	13716235	GRIN2B
chr12_13716238	12	13716238	GRIN2B
chr12_13716241	12	13716241	GRIN2B
chr12_13716283	12	13716283	GRIN2B
chr12_13716298	12	13716298	GRIN2B
chr12_13716301	12	13716301	GRIN2B
chr12_13716325	12	13716325	GRIN2B
exm986516	12	13716328	GRIN2B
chr12_13716334	12	13716334	GRIN2B
1KG_12_13716360	12	13716360	GRIN2B
exm986522	12	13716373	GRIN2B
exm1760665	12	13716375	GRIN2B
chr12_13716379	12	13716379	GRIN2B
chr12_13716388	12	13716388	GRIN2B
chr12_13716391	12	13716391	GRIN2B
chr12_13716406	12	13716406	GRIN2B
chr12_13716437	12	13716437	GRIN2B
chr12_13716445	12	13716445	GRIN2B
chr12_13716455	12	13716455	GRIN2B
chr12_13716463	12	13716463	GRIN2B
chr12_13716478	12	13716478	GRIN2B
chr12_13716518	12	13716518	GRIN2B
chr12_13716527	12	13716527	GRIN2B
chr12_13716553	12	13716553	GRIN2B
chr12_13716554	12	13716554	GRIN2B
chr12_13716555	12	13716555	GRIN2B
chr12_13716559	12	13716559	GRIN2B
chr12_13716580	12	13716580	GRIN2B
chr12_13716582	12	13716582	GRIN2B
chr12_13716634	12	13716634	GRIN2B
chr12_13716664	12	13716664	GRIN2B
chr12_13716667	12	13716667	GRIN2B
chr12_13716685	12	13716685	GRIN2B
chr12_13716703	12	13716703	GRIN2B
chr12_13716706	12	13716706	GRIN2B
chr12_13716733	12	13716733	GRIN2B
chr12_13716735	12	13716735	GRIN2B
chr12_13716751	12	13716751	GRIN2B
chr12_13716754	12	13716754	GRIN2B
exm986540	12	13716759	GRIN2B
chr12_13716760	12	13716760	GRIN2B
chr12_13716766	12	13716766	GRIN2B
exm2276230	12	13716783	GRIN2B
chr12_13716793	12	13716793	GRIN2B
chr12_13716838	12	13716838	GRIN2B
chr12_13716856	12	13716856	GRIN2B
chr12_13716862	12	13716862	GRIN2B
chr12_13716871	12	13716871	GRIN2B
chr12_13716883	12	13716883	GRIN2B
chr12_13716888	12	13716888	GRIN2B
chr12_13716901	12	13716901	GRIN2B
chr12_13716904	12	13716904	GRIN2B
chr12_13716916	12	13716916	GRIN2B
chr12_13716922	12	13716922	GRIN2B
chr12_13716925	12	13716925	GRIN2B
chr12_13716928	12	13716928	GRIN2B
chr12_13716952	12	13716952	GRIN2B
chr12_13717039	12	13717039	GRIN2B
chr12_13717072	12	13717072	GRIN2B
chr12_13717132	12	13717132	GRIN2B
chr12_13717228	12	13717228	GRIN2B
chr12_13717246	12	13717246	GRIN2B
chr12_13717273	12	13717273	GRIN2B
chr12_13717306	12	13717306	GRIN2B
chr12_13717309	12	13717309	GRIN2B
chr12_13717334	12	13717334	GRIN2B
exm986558	12	13717359	GRIN2B
chr12_13717390	12	13717390	GRIN2B
chr12_13717396	12	13717396	GRIN2B
chr12_13717417	12	13717417	GRIN2B
chr12_13717531	12	13717531	GRIN2B
chr12_13717537	12	13717537	GRIN2B
chr12_13717540	12	13717540	GRIN2B
chr12_13717559	12	13717559	GRIN2B
chr12_13719995	12	13719995	GRIN2B
chr12_13720010	12	13720010	GRIN2B
chr12_13720018	12	13720018	GRIN2B
chr12_13720024	12	13720024	GRIN2B
chr12_13720025	12	13720025	GRIN2B
chr12_13720026	12	13720026	GRIN2B
chr12_13720042	12	13720042	GRIN2B
chr12_13720043	12	13720043	GRIN2B
chr12_13720083	12	13720083	GRIN2B
chr12_13720123	12	13720123	GRIN2B
chr12_13720144	12	13720144	GRIN2B
chr12_13720147	12	13720147	GRIN2B
chr12_13720169	12	13720169	GRIN2B
chr12_13720170	12	13720170	GRIN2B
chr12_13720180	12	13720180	GRIN2B
chr12_13720186	12	13720186	GRIN2B
chr12_13720189	12	13720189	GRIN2B
chr12_13720195	12	13720195	GRIN2B
chr12_13722770	12	13722770	GRIN2B
chr12_13722779	12	13722779	GRIN2B
chr12_13722800	12	13722800	GRIN2B
chr12_13722806	12	13722806	GRIN2B
chr12_13722807	12	13722807	GRIN2B
chr12_13722808	12	13722808	GRIN2B
chr12_13722821	12	13722821	GRIN2B
chr12_13722824	12	13722824	GRIN2B
chr12_13722860	12	13722860	GRIN2B
chr12_13722884	12	13722884	GRIN2B
chr12_13722885	12	13722885	GRIN2B
chr12_13722893	12	13722893	GRIN2B
chr12_13722950	12	13722950	GRIN2B
chr12_13724745	12	13724745	GRIN2B
chr12_13724778	12	13724778	GRIN2B
chr12_13724787	12	13724787	GRIN2B
chr12_13724790	12	13724790	GRIN2B
chr12_13724808	12	13724808	GRIN2B
chr12_13724835	12	13724835	GRIN2B
chr12_13724892	12	13724892	GRIN2B
chr12_13724895	12	13724895	GRIN2B
chr12_13761539	12	13761539	GRIN2B
chr12_13761563	12	13761563	GRIN2B
chr12_13761575	12	13761575	GRIN2B
chr12_13761581	12	13761581	GRIN2B
chr12_13761642	12	13761642	GRIN2B
chr12_13761643	12	13761643	GRIN2B
chr12_13761662	12	13761662	GRIN2B
chr12_13761677	12	13761677	GRIN2B
chr12_13761686	12	13761686	GRIN2B
chr12_13761717	12	13761717	GRIN2B
chr12_13761718	12	13761718	GRIN2B
chr12_13761724	12	13761724	GRIN2B
chr12_13761726	12	13761726	GRIN2B
chr12_13761758	12	13761758	GRIN2B
chr12_13764659	12	13764659	GRIN2B
chr12_13764662	12	13764662	GRIN2B
exm986584	12	13764671	GRIN2B
chr12_13764675	12	13764675	GRIN2B
chr12_13764707	12	13764707	GRIN2B
chr12_13764762	12	13764762	GRIN2B
chr12_13764763	12	13764763	GRIN2B
chr12_13768141	12	13768141	GRIN2B
chr12_13768143	12	13768143	GRIN2B
chr12_13768147	12	13768147	GRIN2B
chr12_13768150	12	13768150	GRIN2B
chr12_13768153	12	13768153	GRIN2B
chr12_13768192	12	13768192	GRIN2B
chr12_13768429	12	13768429	GRIN2B
chr12_13768432	12	13768432	GRIN2B
chr12_13768445	12	13768445	GRIN2B
chr12_13768446	12	13768446	GRIN2B
chr12_13768453	12	13768453	GRIN2B
chr12_13768462	12	13768462	GRIN2B
chr12_13768465	12	13768465	GRIN2B
chr12_13768510	12	13768510	GRIN2B
chr12_13768519	12	13768519	GRIN2B
chr12_13768531	12	13768531	GRIN2B
chr12_13768555	12	13768555	GRIN2B
chr12_13768556	12	13768556	GRIN2B
chr12_13768559	12	13768559	GRIN2B
chr12_13768564	12	13768564	GRIN2B
chr12_13768567	12	13768567	GRIN2B
chr12_13768582	12	13768582	GRIN2B
chr12_13768585	12	13768585	GRIN2B
chr12_13768594	12	13768594	GRIN2B
chr12_13769390	12	13769390	GRIN2B
chr12_13769405	12	13769405	GRIN2B
chr12_13769408	12	13769408	GRIN2B
chr12_13769409	12	13769409	GRIN2B
chr12_13769430	12	13769430	GRIN2B
chr12_13769438	12	13769438	GRIN2B
chr12_13769459	12	13769459	GRIN2B
chr12_13769480	12	13769480	GRIN2B
chr12_13769483	12	13769483	GRIN2B
chr12_13769513	12	13769513	GRIN2B
chr12_13769516	12	13769516	GRIN2B
chr12_13769519	12	13769519	GRIN2B
chr12_13769522	12	13769522	GRIN2B
chr12_13769528	12	13769528	GRIN2B
chr12_13769540	12	13769540	GRIN2B
chr12_13769545	12	13769545	GRIN2B
chr12_13769564	12	13769564	GRIN2B
chr12_13769579	12	13769579	GRIN2B
chr12_13769580	12	13769580	GRIN2B
chr12_13769581	12	13769581	GRIN2B
exm-rs2160519	12	13787846	GRIN2B
newrs3751257	12	13828674	GRIN2B
chr12_13828684	12	13828684	GRIN2B
chr12_13828685	12	13828685	GRIN2B
chr12_13828686	12	13828686	GRIN2B
chr12_13828696	12	13828696	GRIN2B
chr12_13828735	12	13828735	GRIN2B
chr12_13828747	12	13828747	GRIN2B
chr12_13828758	12	13828758	GRIN2B
chr12_13828771	12	13828771	GRIN2B
psy_rs138009610	12	13863975	GRIN2B
chr12_13906270	12	13906270	GRIN2B
chr12_13906285	12	13906285	GRIN2B
chr12_13906315	12	13906315	GRIN2B
chr12_13906375	12	13906375	GRIN2B
chr12_13906381	12	13906381	GRIN2B
chr12_13906387	12	13906387	GRIN2B
chr12_13906406	12	13906406	GRIN2B
chr12_13906407	12	13906407	GRIN2B
chr12_13906447	12	13906447	GRIN2B
exm986610	12	13906449	GRIN2B
chr12_13906493	12	13906493	GRIN2B
chr12_13906494	12	13906494	GRIN2B
chr12_13906537	12	13906537	GRIN2B
chr12_13906555	12	13906555	GRIN2B
chr12_13906558	12	13906558	GRIN2B
chr12_13906591	12	13906591	GRIN2B
chr12_13906597	12	13906597	GRIN2B
chr12_13906600	12	13906600	GRIN2B
chr12_13906606	12	13906606	GRIN2B
chr12_13906612	12	13906612	GRIN2B
chr12_13906618	12	13906618	GRIN2B
chr12_13906660	12	13906660	GRIN2B
chr12_13906663	12	13906663	GRIN2B
chr12_13906669	12	13906669	GRIN2B
chr12_13906670	12	13906670	GRIN2B
chr12_13906671	12	13906671	GRIN2B
chr12_13906690	12	13906690	GRIN2B
chr12_13906708	12	13906708	GRIN2B
chr12_13906723	12	13906723	GRIN2B
chr12_13906763	12	13906763	GRIN2B
chr12_13906764	12	13906764	GRIN2B
chr12_13906774	12	13906774	GRIN2B
chr12_13906777	12	13906777	GRIN2B
chr12_13906804	12	13906804	GRIN2B
chr12_13906807	12	13906807	GRIN2B
chr12_13906810	12	13906810	GRIN2B
chr12_13906828	12	13906828	GRIN2B
chr12_13906846	12	13906846	GRIN2B
psy_rs147062606	12	13927428	GRIN2B
psy_rs189705599	12	14010300	GRIN2B
chr12_14018734	12	14018734	GRIN2B
chr12_14018791	12	14018791	GRIN2B
chr12_14018815	12	14018815	GRIN2B
chr12_14018827	12	14018827	GRIN2B
chr12_14018830	12	14018830	GRIN2B
chr12_14018860	12	14018860	GRIN2B
chr12_14018920	12	14018920	GRIN2B
chr12_14018938	12	14018938	GRIN2B
chr12_14018980	12	14018980	GRIN2B
chr12_14019004	12	14019004	GRIN2B
chr12_14019055	12	14019055	GRIN2B
chr12_14019058	12	14019058	GRIN2B
chr12_14019105	12	14019105	GRIN2B
chr12_14019112	12	14019112	GRIN2B
chr12_14019119	12	14019119	GRIN2B
chr12_14019122	12	14019122	GRIN2B
chr12_14019127	12	14019127	GRIN2B
chr12_14019133	12	14019133	GRIN2B
chr12_14019139	12	14019139	GRIN2B
rs219889	12	14085582	GRIN2B
rs4764043	12	14115482	GRIN2B
exm2220346	12	20963638	SLCO1B3
kgp27709061	12	20968741	SLCO1B3
rs12824927	12	20986061	SLCO1B3
exm988702	12	21007985	SLCO1B3
rs11045565	12	21008004	SLCO1B3
exm988705	12	21008031	SLCO1B3
exm1762919	12	21011481	SLCO1B3
kgp27671992	12	21014025	SLCO1B3
exm988720	12	21014030	SLCO1B3
indel.23568	12	21015372	SLCO1B3
variant.23572	12	21015689	SLCO1B3
exm988737	12	21015737	SLCO1B3
exm988760	12	21030723	SLCO1B3
exm2220348	12	21030871	SLCO1B3
exm988774	12	21032475	SLCO1B3
exm988781	12	21032543	SLCO1B3
exm988786	12	21033823	SLCO1B3
indel.23584	12	21033874	SLCO1B3
exm988796	12	21036442	SLCO1B3
exm988799	12	21036464	SLCO1B3
exm988803	12	21036533	SLCO1B3
variant.23589	12	21051439	SLCO1B3
indel.23590	12	21054330	SLCO1B3
exm988812	12	21054391	SLCO1B3
rs11045595	12	21064348	SLCO1B3
variant.23592	12	21068937	SLCO1B3
exm988819	12	21069048	SLCO1B3
kgp27604728	12	21069499	SLCO1B3
kgp18936190	12	21069808	SLCO1B3
rs2010668	12	21294293	SLCO1B1
rs11557087	12	21294536	SLCO1B1
exm988924	12	21325669	SLCO1B1
exm2250771	12	21325709	SLCO1B1
SNP113	12	21327529	SLCO1B1
exm988929	12	21327582	SLCO1B1
exm988930	12	21327601	SLCO1B1
exm988935	12	21329805	SLCO1B1
exm988938	12	21329832	SLCO1B1
exm988941	12	21331546	SLCO1B1
exm988951	12	21331858	SLCO1B1
exm988952	12	21331860	SLCO1B1
exm988983	12	21349885	SLCO1B1
exm988985	12	21349910	SLCO1B1
kgp19005883	12	21350034	SLCO1B1
exm988998	12	21353505	SLCO1B1
SNP133-2	12	21353529	SLCO1B1
exm989003	12	21353551	SLCO1B1
kgp19043658	12	21353557	SLCO1B1
variant.23607	12	21353564	SLCO1B1
exm989006	12	21355489	SLCO1B1
SNP16	12	21355583	SLCO1B1
exm989012	12	21355598	SLCO1B1
exm989015	12	21355611	SLCO1B1
kgp19162083	12	21358922	SLCO1B1
exm989020	12	21358933	SLCO1B1
kgp19016646	12	21358933	SLCO1B1
kgp18791022	12	21358965	SLCO1B1
exm989023	12	21358965	SLCO1B1
variant.23608	12	21375233	SLCO1B1
kgp18770558	12	21375289	SLCO1B1
indel.23610	12	21375295	SLCO1B1
variant.23611	12	21375303	SLCO1B1
exm989043	12	21377774	SLCO1B1
exm989046	12	21391976	SLCO1B1
exm989049	12	21392079	SLCO1B1
exm1763111	12	21392092	SLCO1B1
kgp18994182	12	21392205	SLCO1B1
kgp19144716	12	21392244	SLCO1B1
rs4149085	12	21392290	SLCO1B1
kgp9072354	12	21392698	SLCO1B1
kgp19077368	12	21417618	SLCO1A2
kgp18756858	12	21417704	SLCO1A2
kgp18783578	12	21417899	SLCO1A2
kgp19033251	12	21418349	SLCO1A2
rs12315259	12	21418581	SLCO1A2
kgp19005951	12	21418634	SLCO1A2
kgp18925372	12	21418783	SLCO1A2
kgp18992950	12	21418825	SLCO1A2
kgp27857356	12	21418924	SLCO1A2
kgp18907944	12	21419223	SLCO1A2
kgp5537934	12	21419365	SLCO1A2
kgp18989376	12	21419797	SLCO1A2
kgp10092760	12	21419906	SLCO1A2
kgp27874650	12	21419908	SLCO1A2
rs11045917	12	21419948	SLCO1A2
kgp18782031	12	21421458	SLCO1A2
kgp18942601	12	21421655	SLCO1A2
kgp18926732	12	21421780	SLCO1A2
kgp19094808	12	21422002	SLCO1A2
kgp19044065	12	21422039	SLCO1A2
kgp7508010	12	21422065	SLCO1A2
kgp19038348	12	21422319	SLCO1A2
kgp18889098	12	21422479	SLCO1A2
exm989056	12	21422492	SLCO1A2
exm989057	12	21422519	SLCO1A2
exm989058	12	21422553	SLCO1A2
variant.23620	12	21422702	SLCO1A2
exm1763129	12	21427515	SLCO1A2
kgp7951664	12	21428307	SLCO1A2
indel.23622	12	21445190	SLCO1A2
indel.23623	12	21446878	SLCO1A2
exm989082	12	21446892	SLCO1A2
kgp18976009	12	21446936	SLCO1A2
exm989091	12	21448555	SLCO1A2
exm989092	12	21448556	SLCO1A2
exm989094	12	21448588	SLCO1A2
exm989095	12	21448604	SLCO1A2
exm989100	12	21450350	SLCO1A2
kgp27669889	12	21450437	SLCO1A2
exm989106	12	21453328	SLCO1A2
rs11568551	12	21453351	SLCO1A2
exm989107	12	21453351	SLCO1A2
rs11568553	12	21453362	SLCO1A2
indel.23626	12	21453391	SLCO1A2
kgp18801792	12	21453466	SLCO1A2
variant.23627	12	21454105	SLCO1A2
rs11832851	12	21454479	SLCO1A2
exm989124	12	21457402	SLCO1A2
rs11568563	12	21457434	SLCO1A2
exm989127	12	21457447	SLCO1A2
rs11568564	12	21457448	SLCO1A2
exm989129	12	21457454	SLCO1A2
exm989136	12	21459876	SLCO1A2
exm1763155	12	21467482	SLCO1A2
kgp19024393	12	21471732	SLCO1A2
rs11832394	12	21478792	SLCO1A2
exm989157	12	21487544	SLCO1A2
kgp27829502	12	21487585	SLCO1A2
exm2250774	12	21526294	SLCO1A2
exm989159	12	21526294	SLCO1A2
exm989165	12	21526367	SLCO1A2
kgp18707282	12	21527350	SLCO1A2
kgp27679519	12	21531216	SLCO1A2
kgp27549753	12	21531282	SLCO1A2
exm989178	12	21531344	SLCO1A2
rs5486	12	21532100	SLCO1A2
kgp4574142	12	21532191	SLCO1A2
rs5489	12	21532325	SLCO1A2
kgp27631859	12	21532384	SLCO1A2
rs3213208	12	21532459	SLCO1A2
kgp11801419	12	21547846	SLCO1A2
exm990445	12	25368410	KRAS
exm1764546	12	25368455	KRAS
psy_rs61761088	12	25393389	KRAS
newrs104894365	12	25398279	KRAS
newrs121913529	12	25398284	KRAS
exm997634	12	48238704	VDR
exm997637	12	48238728	VDR
exm997639	12	48238740	VDR
exm997641	12	48238765	VDR
exm997644	12	48240127	VDR
exm2250996	12	48240209	VDR
exm997647	12	48240233	VDR
exm997649	12	48240458	VDR
exm997659	12	48249480	VDR
exm997669	12	48251387	VDR
exm2220542	12	48258875	VDR
exm997680	12	48258931	VDR
exm997683	12	48258946	VDR
exm997685	12	48258959	VDR
psy_rs10783218	12	48272743	VDR
variant.24346	12	48272746	VDR
psy_rs2228572	12	48272840	VDR
exm2250998	12	48272840	VDR
exm997699	12	48272889	VDR
rs315129	12	69760861	YEATS4
variant.25953	12	69764760	YEATS4
exm1025792	12	89984882	ATP2B1
exm2221233	12	89992406	ATP2B1
chr12_89992940	12	89992940	ATP2B1
exm1025839	12	90013932	ATP2B1
indel.26369	12	90024437	ATP2B1
exm1025869	12	90049575	ATP2B1
variant.26589	12	99139644	ANKS1B
psy_rs61932188	12	99280027	ANKS1B
psy_rs201412	12	99290313	ANKS1B
psy_rs11609031	12	99307725	ANKS1B
psy_rs10860381	12	99309750	ANKS1B
psy_rs150068139	12	99343891	ANKS1B
rs2035882	12	99568395	ANKS1B
exm2267464	12	99586180	ANKS1B
rs11836131	12	99586180	ANKS1B
rs10507110	12	99598289	ANKS1B
psy_rs4505158	12	99635342	ANKS1B
variant.26590	12	99638120	ANKS1B
chr12_99640096	12	99640096	ANKS1B
exm1028809	12	99640106	ANKS1B
exm1028811	12	99640141	ANKS1B
exm1028812	12	99640157	ANKS1B
exm1028813	12	99640159	ANKS1B
exm1028816	12	99640268	ANKS1B
rs1352921	12	99726603	ANKS1B
rs17029256	12	99755863	ANKS1B
exm1028839	12	99837570	ANKS1B
rs11109868	12	99888617	ANKS1B
psy_rs7973951	12	99890345	ANKS1B
exm1028842	12	99898304	ANKS1B
exm1028843	12	99898391	ANKS1B
rs17029587	12	99922550	ANKS1B
exm1028849	12	100041996	ANKS1B
exm1028850	12	100041997	ANKS1B
exm1028860	12	100042220	ANKS1B
exm1028861	12	100042221	ANKS1B
exm1028862	12	100042281	ANKS1B
exm1028863	12	100042287	ANKS1B
var_12_100042292	12	100042293	ANKS1B
exm1028870	12	100042482	ANKS1B
exm1028871	12	100042539	ANKS1B
exm1028887	12	100169425	ANKS1B
exm1028893	12	100200474	ANKS1B
psy_rs117579597	12	100236005	ANKS1B
psy_rs1095787	12	100250724	ANKS1B
exm-rs11110077	12	100266113	ANKS1B
exm1028906	12	100377966	ANKS1B
indel.28871	13	28578195	FLT3
exm1059924	13	28578209	FLT3
exm1059926	13	28578221	FLT3
exm1059927	13	28578253	FLT3
exm1794082	13	28578254	FLT3
exm1059930	13	28578283	FLT3
exm1059939	13	28589322	FLT3
rs9512980	13	28595609	FLT3
exm1059953	13	28597522	FLT3
exm1059955	13	28597593	FLT3
newrs146853291	13	28598998	FLT3
exm1059962	13	28599077	FLT3
exm1059981	13	28608473	FLT3
exm2251383	13	28610152	FLT3
exm1060004	13	28611336	FLT3
exm1060006	13	28611382	FLT3
rs7317427	13	28620563	FLT3
exm1060008	13	28622544	FLT3
exm1060015	13	28623587	FLT3
exm1794122	13	28623831	FLT3
exm1060027	13	28624246	FLT3
exm1060033	13	28626704	FLT3
exm1060035	13	28626716	FLT3
exm1060040	13	28631519	FLT3
exm1060053	13	28644747	FLT3
exm1068060	13	47409048	HTR2A
exm1068061	13	47409049	HTR2A
exm1068076	13	47409480	HTR2A
exm1068083	13	47409700	HTR2A
exm1068096	13	47469968	HTR2A
exm1068100	13	47470824	HTR2A
exm1797597	13	48611934	NUDT15
kgp5542930	13	95672105	ABCC4
kgp16866672	13	95672134	ABCC4
kgp16825126	13	95672136	ABCC4
kgp16762959	13	95672171	ABCC4
kgp2899713	13	95672265	ABCC4
kgp16687275	13	95672438	ABCC4
kgp16833888	13	95672505	ABCC4
kgp16870658	13	95672528	ABCC4
kgp16799970	13	95672886	ABCC4
kgp16691471	13	95673361	ABCC4
kgp16623494	13	95673365	ABCC4
kgp5535863	13	95673607	ABCC4
exm1074659	13	95673837	ABCC4
kgp16599081	13	95686955	ABCC4
rs11568640	13	95695948	ABCC4
exm1074680	13	95696012	ABCC4
kgp1394218	13	95696540	ABCC4
exm1074687	13	95696686	ABCC4
rs9302043	13	95700995	ABCC4
exm1074692	13	95705380	ABCC4
exm1074703	13	95715113	ABCC4
variant.30002	13	95723911	ABCC4
exm1074708	13	95724008	ABCC4
variant.30004	13	95725496	ABCC4
rs11568707	13	95726518	ABCC4
kgp25837848	13	95726538	ABCC4
exm1074732	13	95727794	ABCC4
rs12016723	13	95731736	ABCC4
exm1074738	13	95735502	ABCC4
rs11568694	13	95735520	ABCC4
kgp16574494	13	95748192	ABCC4
exm1074747	13	95768231	ABCC4
rs11568659	13	95768252	ABCC4
psy_rs28407723	13	95783725	ABCC4
exm1074754	13	95813572	ABCC4
exm1074758	13	95815454	ABCC4
rs11568666	13	95816707	ABCC4
newrs143187305	13	95816774	ABCC4
var_13_95818407	13	95818407	ABCC4
variant.30009	13	95818411	ABCC4
exm1801443	13	95818524	ABCC4
exm1074769	13	95818571	ABCC4
rs11568699	13	95818571	ABCC4
newrs149813736	13	95838955	ABCC4
exm1074789	13	95839002	ABCC4
kgp7284652	13	95839003	ABCC4
exm1074791	13	95839008	ABCC4
rs11568668	13	95839040	ABCC4
rs11568670	13	95839042	ABCC4
exm1074798	13	95839128	ABCC4
exm1074806	13	95847145	ABCC4
kgp26095098	13	95847161	ABCC4
exm1074812	13	95858806	ABCC4
rs11568701	13	95858880	ABCC4
kgp25879697	13	95858898	ABCC4
exm2251598	13	95858912	ABCC4
exm1074831	13	95861761	ABCC4
rs9302049	13	95873985	ABCC4
exm1074862	13	95899239	ABCC4
rs9524866	13	95907315	ABCC4
rs7325256	13	95911944	ABCC4
rs4148433	13	95912537	ABCC4
kgp97387	13	95953517	ABCC4
rs4983035	14	25393389	STXBP6
exm1106129	14	62187212	HIF1A
exm1106134	14	62188298	HIF1A
psy_rs80118872	14	62192528	HIF1A
variant.32312	14	62193541	HIF1A
exm1106159	14	62203623	HIF1A
exm1106160	14	62203643	HIF1A
exm1106166	14	62204808	HIF1A
exm1106167	14	62204819	HIF1A
exm1106172	14	62204978	HIF1A
exm1106182	14	62207575	HIF1A
exm1106194	14	62207848	HIF1A
exm1106196	14	62207879	HIF1A
exm1106197	14	62207893	HIF1A
rs2277468	14	103024080
exm1147952	15	40231779	EIF2AK4
indel.34570	15	40235627	EIF2AK4
exm1147965	15	40241452	EIF2AK4
exm1147968	15	40246136	EIF2AK4
exm1147973	15	40247876	EIF2AK4
exm2223192	15	40247902	EIF2AK4
exm1147977	15	40253986	EIF2AK4
variant.34574	15	40259632	EIF2AK4
exm1147987	15	40259632	EIF2AK4
exm1147994	15	40259792	EIF2AK4
exm1148003	15	40260002	EIF2AK4
exm1148006	15	40260064	EIF2AK4
exm1148035	15	40269010	EIF2AK4
exm1148036	15	40269017	EIF2AK4
variant.34578	15	40282583	EIF2AK4
var_15_40284388	15	40284388	EIF2AK4
exm1148062	15	40290939	EIF2AK4
exm1148068	15	40293395	EIF2AK4
exm2252132	15	40293395	EIF2AK4
exm1148073	15	40294929	EIF2AK4
exm1148085	15	40300254	EIF2AK4
indel.34584	15	40303480	EIF2AK4
exm1148105	15	40309385	EIF2AK4
exm1148112	15	40313144	EIF2AK4
variant.34586	15	40318290	EIF2AK4
exm1148126	15	40322614	EIF2AK4
indel.34588	15	40326585	EIF2AK4
exm1161537	15	51503159	CYP19A1
variant.35737	15	51504512	CYP19A1
exm1161578	15	51514572	CYP19A1
variant.35739	15	51514653	CYP19A1
exm1833786	15	51514699	CYP19A1
indel.35740	15	51520050	CYP19A1
variant.35741	15	51529096	CYP19A1
exm2223505	15	51534995	CYP19A1
exm1161608	15	51535061	CYP19A1
kgp19886082	15	58245825	ALDH1A2
kgp19938311	15	58245861	ALDH1A2
rs34599571	15	58246028	ALDH1A2
kgp7078927	15	58246207	ALDH1A2
kgp19808303	15	58246233	ALDH1A2
kgp9514200	15	58246474	ALDH1A2
kgp19944269	15	58246588	ALDH1A2
kgp28473639	15	58246653	ALDH1A2
kgp19870288	15	58246684	ALDH1A2
kgp11728521	15	58246965	ALDH1A2
kgp19783943	15	58246981	ALDH1A2
kgp4607304	15	58246998	ALDH1A2
kgp28486436	15	58247063	ALDH1A2
kgp28370079	15	58247099	ALDH1A2
kgp3548758	15	58247449	ALDH1A2
kgp19940398	15	58253490	ALDH1A2
exm1835455	15	58254226	ALDH1A2
variant.35966	15	58254281	ALDH1A2
rs2218261	15	58294022	ALDH1A2
kgp19775436	15	58302887	ALDH1A2
exm2252220	15	58306161	ALDH1A2
exm1165202	15	58306424	ALDH1A2
exm1165209	15	58357800	ALDH1A2
kgp19913951	15	75012019	CYP1A1
kgp19964059	15	75012117	CYP1A1
kgp19794882	15	75012207	CYP1A1
kgp28430319	15	75012217	CYP1A1
kgp19967485	15	75012471	CYP1A1
kgp19915208	15	75012487	CYP1A1
kgp19889819	15	75012644	CYP1A1
exm1176854	15	75012925	CYP1A1
exm1176857	15	75012940	CYP1A1
exm1176859	15	75012979	CYP1A1
exm1176862	15	75012987	CYP1A1
exm1176867	15	75013051	CYP1A1
indel.36754	15	75013087	CYP1A1
exm1176870	15	75013347	CYP1A1
variant.36755	15	75013395	CYP1A1
rs2856833	15	75013563	CYP1A1
exm1839883	15	75013633	CYP1A1
SNP31	15	75013804	CYP1A1
variant.36757	15	75013932	CYP1A1
variant.36758	15	75013983	CYP1A1
exm1176880	15	75014027	CYP1A1
SNP76	15	75014049	CYP1A1
exm1176883	15	75014049	CYP1A1
variant.36759	15	75014637	CYP1A1
exm1176890	15	75014718	CYP1A1
exm1176891	15	75014727	CYP1A1
exm1176895	15	75014793	CYP1A1
exm1176898	15	75014825	CYP1A1
exm1176910	15	75015036	CYP1A1
exm1176911	15	75015045	CYP1A1
exm1176921	15	75015138	CYP1A1
exm1176923	15	75015161	CYP1A1
exm1176924	15	75015162	CYP1A1
exm1176926	15	75015197	CYP1A1
exm1176927	15	75015206	CYP1A1
exm1176935	15	75015305	CYP1A1
exm1176944	15	75042132	CYP1A2
exm1176949	15	75042198	CYP1A2
exm2223809	15	75042217	CYP1A2
exm1176951	15	75042221	CYP1A2
exm1176957	15	75042296	CYP1A2
exm1176958	15	75042302	CYP1A2
exm1176960	15	75042327	CYP1A2
exm1176967	15	75042389	CYP1A2
exm1176975	15	75042492	CYP1A2
exm1176983	15	75042674	CYP1A2
exm1176986	15	75042692	CYP1A2
rs17861155	15	75042694	CYP1A2
exm1839908	15	75042695	CYP1A2
exm1176991	15	75043539	CYP1A2
exm1176994	15	75043592	CYP1A2
exm1176995	15	75043593	CYP1A2
exm1177000	15	75044195	CYP1A2
exm1177002	15	75044485	CYP1A2
exm2274770	15	75044489	CYP1A2
rs2960193	15	75045567	CYP1A2
newrs56107638	15	75045612	CYP1A2
exm1177015	15	75047161	CYP1A2
exm1177016	15	75047169	CYP1A2
exm1177019	15	75047191	CYP1A2
exm1177033	15	75047400	CYP1A2
exm2223813	15	75047412	CYP1A2
chr15_78879029	15	78879029	CHRNA5
indel.36987	15	78880731	CHRNA5
psy_rs2229961	15	78880752	CHRNA5
exm1180560	15	78880752	CHRNA5
exm1180564	15	78882233	CHRNA5
indel.36989	15	78882386	CHRNA5
exm1180569	15	78882446	CHRNA5
exm1180584	15	78882682	CHRNA5
exm1180586	15	78882726	CHRNA5
exm2252318	15	78882726	CHRNA5
exm1180594	15	78882821	CHRNA5
exm1180596	15	78882920	CHRNA5
exm1180600	15	78882934	CHRNA5
var_15_78885488	15	78885489	CHRNA5
exm1180607	15	78885574	CHRNA5
rs7163480	15	78887171	CHRNA5
exm1841169	15	78888969	CHRNA3
exm1180621	15	78893741	CHRNA3
exm1180632	15	78893864	CHRNA3
exm1180633	15	78893872	CHRNA3
indel.36999	15	78894036	CHRNA3
exm1180656	15	78894335	CHRNA3
psy_rs28681284	15	78908565	CHRNA3
exm1180678	15	78909414	CHRNA3
exm1180688	15	78911230	CHRNA3
rs16940016	16	23322445	SCNN1B
rs8055868	16	23348251	SCNN1B
psy_rs150935172	16	23355581	SCNN1B
exm1226037	16	23360101	SCNN1B
exm1226049	16	23364238	SCNN1B
exm1226050	16	23364276	SCNN1B
exm1226063	16	23366809	SCNN1B
exm1226069	16	23379257	SCNN1B
exm1226072	16	23379279	SCNN1B
exm1226091	16	23387068	SCNN1B
exm1226093	16	23387096	SCNN1B
exm1226096	16	23387134	SCNN1B
exm1226097	16	23387135	SCNN1B
exm1226098	16	23387159	SCNN1B
psy_rs585589	16	23388167	SCNN1B
exm2252508	16	23388514	SCNN1B
exm1851867	16	23388515	SCNN1B
exm1226104	16	23388540	SCNN1B
exm1851873	16	23388705	SCNN1B
exm1226133	16	23391887	SCNN1B
exm1226135	16	23391893	SCNN1B
exm1226138	16	23391905	SCNN1B
exm1226143	16	23391964	SCNN1B
exm1226144	16	23391980	SCNN1B
exm1226147	16	23391989	SCNN1B
kgp16263792	16	28603683	SULT1A2
exm1853853	16	28603710	SULT1A2
exm1229823	16	28604628	SULT1A2
rs1042014	16	28618318	SULT1A1
kgp16461928	16	28619866	SULT1A1
exm1230289	16	28877684	SH2B1
exm1230290	16	28877711	SH2B1
exm1230297	16	28877864	SH2B1
exm1230300	16	28877939	SH2B1
exm1230314	16	28878202	SH2B1
exm1230357	16	28883993	SH2B1
exm1230366	16	28884858	SH2B1
exm1235096	16	31012480	STX1B
exm1235611	16	31104714	VKORC1
exm1235612	16	31104720	VKORC1
chr16_55844428	16	55844428	CES1
exm1241617	16	55853491	CES1
kgp5992356	16	55855361	CES1
exm1241664	16	55860206	CES1
exm1241668	16	55862682	CES1
kgp22793919	16	55862873	CES1
exm1241699	16	55866915	CES1
exm1241701	16	55866937	CES1
exm1242589	16	56899228	SLC12A3
exm1242604	16	56901033	SLC12A3
exm1242607	16	56901062	SLC12A3
exm2274843	16	56901090	SLC12A3
exm1242610	16	56901121	SLC12A3
exm1242616	16	56902283	SLC12A3
exm1242617	16	56902284	SLC12A3
exm1242618	16	56903640	SLC12A3
exm2277096	16	56903674	SLC12A3
exm1861596	16	56903674	SLC12A3
exm1861599	16	56904091	SLC12A3
exm1242642	16	56904587	SLC12A3
indel.41079	16	56906280	SLC12A3
variant.41080	16	56906321	SLC12A3
exm1242649	16	56906338	SLC12A3
exm1242653	16	56906568	SLC12A3
exm1242654	16	56906569	SLC12A3
exm1242656	16	56906616	SLC12A3
exm1242667	16	56913014	SLC12A3
exm1242676	16	56913478	SLC12A3
exm2252635	16	56913510	SLC12A3
exm2224975	16	56913530	SLC12A3
exm1242693	16	56914051	SLC12A3
exm1242702	16	56914159	SLC12A3
variant.41091	16	56916304	SLC12A3
exm1242713	16	56918000	SLC12A3
exm1861634	16	56918023	SLC12A3
exm1242730	16	56919216	SLC12A3
exm1242742	16	56920317	SLC12A3
exm1242752	16	56920910	SLC12A3
exm1242763	16	56921840	SLC12A3
variant.41108	16	56921844	SLC12A3
exm1242780	16	56924263	SLC12A3
variant.41112	16	56924273	SLC12A3
exm1242793	16	56926915	SLC12A3
variant.41123	16	56933468	SLC12A3
exm1242822	16	56936364	SLC12A3
exm1242823	16	56936365	SLC12A3
exm1242824	16	56936367	SLC12A3
exm1242827	16	56936421	SLC12A3
rs891139	16	56944727	SLC12A3
newrs34803727	16	56947189	SLC12A3
exm1242836	16	56947205	SLC12A3
variant.41134	16	56947277	SLC12A3
exm1242904	16	56995935	CETP
exm1242914	16	56996937	CETP
exm1242939	16	57003846	CETP
variant.41141	16	57005298	CETP
exm1242953	16	57005908	CETP
exm1242967	16	57007387	CETP
exm1242971	16	57009022	CETP
exm1242973	16	57012012	CETP
exm1242975	16	57012039	CETP
exm1861738	16	57012094	CETP
indel.41146	16	57012123	CETP
exm1242983	16	57015076	CETP
variant.41147	16	57015138	CETP
exm2224984	16	57016086	CETP
exm1252348	16	69143315	HAS3
exm1252358	16	69143501	HAS3
exm1252359	16	69143510	HAS3
exm1252360	16	69143512	HAS3
exm1252367	16	69143602	HAS3
exm1252382	16	69143816	HAS3
variant.41839	16	69148918	HAS3
exm1252421	16	69149084	HAS3
exm1252430	16	69152282	HAS3
variant.41840	16	69152329	HAS3
kgp16487166	16	69743562	NQO1
kgp16372204	16	69743644	NQO1
kgp25576820	16	69744499	NQO1
rs1063556	16	69744747	NQO1
rs3191214	16	69744855	NQO1
exm1253075	16	69744897	NQO1
exm2225199	16	69744980	NQO1
variant.41878	16	69745067	NQO1
exm1253083	16	69745172	NQO1
variant.41880	16	69746982	NQO1
exm1865970	16	69748868	NQO1
exm1253088	16	69748869	NQO1
indel.41881	16	69748873	NQO1
newrs140464487	16	69748929	NQO1
exm1253095	16	69748929	NQO1
exm1253103	16	69752339	NQO1
indel.41884	16	69752345	NQO1
rs689453	16	69752373	NQO1
exm1253118	16	69760341	NQO1
kgp16244866	16	69760341	NQO1
exm1282046	17	4836005	GP1BA
exm1282050	17	4836105	GP1BA
exm1282051	17	4836114	GP1BA
variant.43647	17	4836485	GP1BA
exm1282077	17	4836804	GP1BA
exm1282087	17	4837070	GP1BA
exm1282096	17	4837131	GP1BA
exm1282113	17	4837266	GP1BA
exm1282115	17	4837274	GP1BA
exm1891931	17	4837803	GP1BA
rs4265880	17	7396267	POLR2A
exm1287810	17	7401414	POLR2A
exm1902059	17	7402440	POLR2A
exm2253228	17	7416791	POLR2A
variant.44127	17	7572934	TP53
exm2227309	17	7573945	TP53
exm1903161	17	7574013	TP53
exm1288594	17	7577091	TP53
newrs28934576	17	7577120	TP53
variant.44132	17	7577138	TP53
newrs11540652	17	7577538	TP53
newrs28934575	17	7577548	TP53
newrs121912655	17	7577556	TP53
newrs121912665	17	7578283	TP53
indel.44142	17	7578555	TP53
rs11078205	17	13768150
exm1308754	17	28525548	SLC6A4
variant.45474	17	28530185	SLC6A4
exm1308785	17	28538330	SLC6A4
psy_rs28914832	17	28538374	SLC6A4
exm1308787	17	28538374	SLC6A4
exm2252925	17	28543148	SLC6A4
exm1308801	17	28543148	SLC6A4
exm1880708	17	28543194	SLC6A4
exm1308802	17	28543225	SLC6A4
exm1308803	17	28544299	SLC6A4
exm1880712	17	28544315	SLC6A4
exm1308810	17	28545257	SLC6A4
exm1308827	17	28548810	SLC6A4
exm1308830	17	28548856	SLC6A4
exm1308832	17	28548904	SLC6A4
exm1318614	17	38545886	TOP2A
exm1884976	17	38546329	TOP2A
exm1318625	17	38547868	TOP2A
exm1318629	17	38548575	TOP2A
exm1318634	17	38548888	TOP2A
exm1318650	17	38552663	TOP2A
exm2276504	17	38552665	TOP2A
exm1318652	17	38552666	TOP2A
exm1318653	17	38552674	TOP2A
exm1318654	17	38554867	TOP2A
indel.46081	17	38555096	TOP2A
exm1318671	17	38556798	TOP2A
exm1318676	17	38556902	TOP2A
variant.46082	17	38557102	TOP2A
exm1318684	17	38559269	TOP2A
exm1318687	17	38560463	TOP2A
newrs140672916	17	38563079	TOP2A
exm1885028	17	38567951	TOP2A
variant.46086	17	38572252	TOP2A
psy_rs138728946	17	43873634	MGC57346-CRHR1
psy_rs117389699	17	43903402	MGC57346-CRHR1
exm2226531	17	43906931	MGC57346-CRHR1
exm1330732	17	43906973	MGC57346-CRHR1
exm1335372	17	48262886	COL1A1
exm1335385	17	48263206	COL1A1
exm1335395	17	48263369	COL1A1
exm1335417	17	48264082	COL1A1
exm1335450	17	48265495	COL1A1
exm1335472	17	48266365	COL1A1
exm1335474	17	48266534	COL1A1
exm1335480	17	48266851	COL1A1
exm1335493	17	48267454	COL1A1
exm1335497	17	48267725	COL1A1
exm1335533	17	48270048	COL1A1
exm1335539	17	48270160	COL1A1
exm1335543	17	48270355	COL1A1
exm1335552	17	48271380	COL1A1
exm1335562	17	48271741	COL1A1
exm1335584	17	48272827	COL1A1
exm1335587	17	48273298	COL1A1
psy_rs41317353	17	48274268	COL1A1
exm1335611	17	48274551	COL1A1
exm1335620	17	48275339	COL1A1
exm1335654	17	48278798	COL1A1
exm1343993	17	61554664	ACE
exm1344006	17	61556410	ACE
exm1344009	17	61556429	ACE
exm1344017	17	61557165	ACE
exm1344021	17	61557223	ACE
exm1344029	17	61557724	ACE
exm1344031	17	61557773	ACE
exm1344037	17	61557841	ACE
exm1344055	17	61558951	ACE
exm1344063	17	61559038	ACE
exm1344069	17	61559850	ACE
exm1344076	17	61559937	ACE
exm1344078	17	61559951	ACE
exm1344079	17	61559967	ACE
exm1344086	17	61560033	ACE
exm1344093	17	61560501	ACE
exm1344094	17	61560506	ACE
exm1344103	17	61560846	ACE
variant.47844	17	61560855	ACE
exm1344105	17	61560876	ACE
exm1344110	17	61561278	ACE
exm1344111	17	61561304	ACE
exm1344120	17	61561867	ACE
exm1344124	17	61561896	ACE
exm1344129	17	61562322	ACE
exm1344131	17	61562373	ACE
exm1344138	17	61562671	ACE
exm1344159	17	61564428	ACE
exm1344162	17	61566020	ACE
exm1344169	17	61566095	ACE
exm1344195	17	61568577	ACE
exm1344206	17	61570816	ACE
exm1344218	17	61570937	ACE
exm1344221	17	61570992	ACE
exm1344223	17	61571017	ACE
psy_rs12709437	17	61571210	ACE
exm1344233	17	61571755	ACE
exm1344245	17	61574215	ACE
exm1344269	17	61574662	ACE
exm1344271	17	61574675	ACE
psy_rs77902445	17	64312554	PRKCA
rs7216431	17	64454050	PRKCA
rs8074669	17	64462660	PRKCA
rs16959868	17	64652112	PRKCA
exm1347169	17	64728897	PRKCA
variant.48041	17	64734939	PRKCA
exm1347195	17	64738819	PRKCA
rs9893560	17	64759588	PRKCA
psy_rs78610846	17	64780960	PRKCA
exm1347199	17	64783081	PRKCA
exm2227008	17	64784971	PRKCA
exm1347218	17	64800042	PRKCA
exm1371541	18	658001	TYMSOS
exm1371543	18	658024	TYMSOS
exm1371553	18	658109	TYMSOS
exm1916102	18	658121	TYMSOS
kgp1906912	18	658170	TYMSOS
exm1371562	18	662164	TYMS
rs596909	18	669087	TYMS
kgp16205111	18	670618	TYMS
kgp16203050	18	670888	TYMS
kgp5424490	18	672590	TYMS
kgp15959073	18	673211	TYMS
kgp15973402	18	673395	TYMS
exm1378707	18	21353551	LAMA3
rs1942059	18	39062759	KC6
exm1388732	18	55711905	NEDD4L
rs8097619	18	55720220	NEDD4L
rs9950627	18	55748025	NEDD4L
indel.50747	18	55816801	NEDD4L
psy_rs11152061	18	55826363	NEDD4L
exm1388756	18	55912699	NEDD4L
rs17064650	18	55944643	NEDD4L
variant.50748	18	55990571	NEDD4L
exm1388768	18	55992249	NEDD4L
exm1388775	18	55996244	NEDD4L
exm1388778	18	55996337	NEDD4L
newrs140726478	18	56002769	NEDD4L
variant.50751	18	56002770	NEDD4L
variant.50752	18	56008406	NEDD4L
exm1388804	18	56010163	NEDD4L
variant.50806	18	58038669	MC4R
newrs52804924	18	58038687	MC4R
exm1915230	18	58038777	MC4R
exm1389707	18	58038832	MC4R
exm1389709	18	58038893	MC4R
exm2253487	18	58038893	MC4R
exm1389713	18	58038964	MC4R
exm1389714	18	58038977	MC4R
exm1389720	18	58039060	MC4R
newrs13447331	18	58039203	MC4R
exm1389729	18	58039203	MC4R
newrs13447329	18	58039248	MC4R
variant.50819	18	58039402	MC4R
exm1389742	18	58039478	MC4R
newrs13447323	18	58039494	MC4R
exm1390172	18	60015458	TNFRSF11A
exm1390180	18	60021723	TNFRSF11A
exm1390226	18	60036429	TNFRSF11A
exm1390233	18	60036565	TNFRSF11A
exm1390235	18	60036669	TNFRSF11A
exm1390243	18	60052034	TNFRSF11A
exm1432879	19	13318811	CACNA1A
exm1432906	19	13320274	CACNA1A
exm1432914	19	13322955	CACNA1A
exm1432921	19	13323261	CACNA1A
exm1432924	19	13323326	CACNA1A
exm1432932	19	13325090	CACNA1A
exm1432939	19	13325415	CACNA1A
exm1432942	19	13335562	CACNA1A
exm1432943	19	13335563	CACNA1A
exm1432944	19	13335580	CACNA1A
exm1432953	19	13342665	CACNA1A
exm1432957	19	13345818	CACNA1A
exm1432997	19	13394081	CACNA1A
exm1433011	19	13397340	CACNA1A
exm1433014	19	13397413	CACNA1A
[truncated: 2,883 more rows]

## Sheet: Monomorphic
SNV	Chr	Bp	Gene
exm15318	1	11856370	MTHFR		SNV	Single-nucleotide variant/PsychArray code
exm16227	1	12266883	TNFRSF1B		Chr	Chromosome
exm38046	1	29185785	OPRD1		Bp	Base pair based in hg19 coordinates.
1KG_1_40129103	1	40129103	NT5C1A		Gene	Annotated gene
exm70280	1	78959081	PTGFR
exm70294	1	78963587	PTGFR
exm70300	1	79002115	PTGFR
exm1908770	1	79002230	PTGFR
seq_chr1_97547921	1	97547921	DPYD
variant.5100	1	97700403	DPYD
exm76962	1	97700526	DPYD
seq_chr1_97771795	1	97771795	DPYD
newrs147601618	1	97915724	DPYD
exm77038	1	98039526	DPYD
rs1042478	1	98058867	DPYD
rs6675198	1	98157279	DPYD
kgp25205392	1	98185476	DPYD
kgp24802743	1	98186232	DPYD
seq_chr1_98205957	1	98205957	DPYD
exm104523	1	154541971	CHRNB2
exm1717405	1	155289607	FDPS
exm106716	1	155290261	FDPS
variant.7753	1	159272642	FCER1A
exm114158	1	159277559	FCER1A
exm2250085	1	161519554	FCGR3A
exm2231677	1	162326804	NOS1AP
variant.8275	1	169483573	F5
exm121688	1	169484750	F5
exm121733	1	169497321	F5
exm121781	1	169509923	F5
exm121833	1	169510697	F5
exm121850	1	169511071	F5
exm121857	1	169511166	F5
indel.8287	1	169511316	F5
exm121885	1	169511615	F5
variant.8290	1	169512249	F5
exm2231787	1	169512296	F5
variant.8291	1	169512296	F5
indel.8293	1	169524460	F5
newrs118203905	1	169524538	F5
var_1_169528429	1	169528429	F5
exm136193	1	201010719	CACNA1S
exm136205	1	201012541	CACNA1S
exm136292	1	201028388	CACNA1S
exm136293	1	201028417	CACNA1S
exm136299	1	201029866	CACNA1S
chr1_201042727	1	201042727	CACNA1S
chr1_201042742	1	201042742	CACNA1S
chr1_201042757	1	201042757	CACNA1S
chr1_201043644	1	201043644	CACNA1S
chr1_201043668	1	201043668	CACNA1S
chr1_201043674	1	201043674	CACNA1S
chr1_201044630	1	201044630	CACNA1S
chr1_201047182	1	201047182	CACNA1S
exm136441	1	201052358	CACNA1S
chr1_201052375	1	201052375	CACNA1S
chr1_201052389	1	201052389	CACNA1S
chr1_201052413	1	201052413	CACNA1S
chr1_201054570	1	201054570	CACNA1S
chr1_201054648	1	201054648	CACNA1S
chr1_201054660	1	201054660	CACNA1S
chr1_201057002	1	201057002	CACNA1S
chr1_201057031	1	201057031	CACNA1S
chr1_201060807	1	201060807	CACNA1S
chr1_201060891	1	201060891	CACNA1S
chr1_201061130	1	201061130	CACNA1S
chr1_201061148	1	201061148	CACNA1S
chr1_201061178	1	201061178	CACNA1S
chr1_201063146	1	201063146	CACNA1S
exm136509	1	201063146	CACNA1S
chr1_201079355	1	201079355	CACNA1S
chr1_201081317	1	201081317	CACNA1S
chr1_201081344	1	201081344	CACNA1S
chr1_201081428	1	201081428	CACNA1S
exm152980	1	226016593	EPHX1
exm152995	1	226019646	EPHX1
SNP69	10	96522512	CYP2C19
rs28399505	10	96534867	CYP2C19
exm843922	10	96535296	CYP2C19
rs28399510	10	96540276	CYP2C19
newrs72558186	10	96541756	CYP2C19
rs9332130	10	96709037	CYP2C9
exm844054	10	96741124	CYP2C9
exm2249447	10	96741124	CYP2C9
rs17847032	10	96745825	CYP2C9
exm1688514	10	96745827	CYP2C9
rs28371687	10	96745878	CYP2C9
exm844091	10	96798669	CYP2C8
exm844098	10	96798758	CYP2C8
exm844119	10	96802804	CYP2C8
newrs72558196	10	96826971	CYP2C8
newrs144284469	10	96828992	CYP2C8
exm844176	10	96828993	CYP2C8
variant.14426	10	104852894	NT5C2
variant.14427	10	104854197	NT5C2
exm852884	10	104861066	NT5C2
exm852886	10	104866388	NT5C2
psy_rs11191590	10	104931818	NT5C2
exm856283	10	114799880	TCF7L2
exm856288	10	114849271	TCF7L2
var_10_114912199	10	114912199	TCF7L2
exm856316	10	114920400	TCF7L2
newrs74771533	10	135345087	CYP2E1
exm2216933	10	135346202	CYP2E1
kgp29696689	10	135350643	CYP2E1
exm868780	10	135350716	CYP2E1
exm868787	10	135351280	CYP2E1
exm868789	10	135351352	CYP2E1
exm891061	11	11348721	GALNT18
exm891127	11	11454291	GALNT18
rs11568623	11	62749434	SLC22A6
rs11568493	11	62763607	SLC22A8
indel.18807	11	62766394	SLC22A8
exm920223	11	62766520	SLC22A8
kgp22990572	11	62766525	SLC22A8
rs11231819	11	64323557	SLC22A11
exm922977	11	64359252	SLC22A12
exm922988	11	64360279	SLC22A12
exm933764	11	67352705	GSTP1
exm933772	11	67353669	GSTP1
exm933774	11	67353887	GSTP1
1KG_11_67354006	11	67354006	GSTP1
exm941408	11	74880746	SLCO2B1
exm951674	11	102984941	DYNC2H1
var_11_102993722	11	102993723	DYNC2H1
exm2274526	11	103004335	DYNC2H1
exm951770	11	103025465	DYNC2H1
exm951854	11	103047087	DYNC2H1
variant.20954	11	103048551	DYNC2H1
exm951938	11	103070158	DYNC2H1
exm951966	11	103086586	DYNC2H1
exm951986	11	103104791	DYNC2H1
exm951987	11	103104827	DYNC2H1
exm952039	11	103157019	DYNC2H1
exm952053	11	103175330	DYNC2H1
exm2249525	11	103228973	DYNC2H1
newrs56399311	11	108181006	ATM
exm953802	11	108181014	ATM
exm953807	11	108186606	ATM
exm953828	11	108192112	ATM
exm953840	11	108198384	ATM
newrs28904921	11	108199929	ATM
exm953859	11	108201023	ATM
exm953860	11	108201108	ATM
variant.21147	11	108202296	ATM
variant.21161	11	108224555	ATM
variant.21164	11	108236095	ATM
exm1693930	11	108302498	C11orf65
exm956259	11	113264244	ANKK1
indel.21371	11	113265749	ANKK1
exm956303	11	113266863	ANKK1
exm956319	11	113269719	ANKK1
exm963706	11	120769275	GRIK4
exm963707	11	120769284	GRIK4
exm963741	11	120827572	GRIK4
exm963759	11	120833252	GRIK4
exm965108	11	123476158	GRAMD1B
exm965112	11	123477383	GRAMD1B
exm965155	11	123485507	GRAMD1B
indel.22722	12	6439755	TNFRSF1A
exm1782293	12	6443327	TNFRSF1A
exm1784053	12	6952799	GNB3
chr12_13715746	12	13715746	GRIN2B
chr12_13715794	12	13715794	GRIN2B
exm986491	12	13715799	GRIN2B
chr12_13715807	12	13715807	GRIN2B
chr12_13715890	12	13715890	GRIN2B
chr12_13716049	12	13716049	GRIN2B
chr12_13716136	12	13716136	GRIN2B
chr12_13716199	12	13716199	GRIN2B
chr12_13716307	12	13716307	GRIN2B
chr12_13716433	12	13716433	GRIN2B
chr12_13716436	12	13716436	GRIN2B
chr12_13716446	12	13716446	GRIN2B
chr12_13716511	12	13716511	GRIN2B
chr12_13716577	12	13716577	GRIN2B
chr12_13716581	12	13716581	GRIN2B
chr12_13716616	12	13716616	GRIN2B
chr12_13716734	12	13716734	GRIN2B
chr12_13716796	12	13716796	GRIN2B
chr12_13716937	12	13716937	GRIN2B
chr12_13717008	12	13717008	GRIN2B
chr12_13717051	12	13717051	GRIN2B
chr12_13717081	12	13717081	GRIN2B
chr12_13717154	12	13717154	GRIN2B
chr12_13717270	12	13717270	GRIN2B
chr12_13717279	12	13717279	GRIN2B
chr12_13717310	12	13717310	GRIN2B
chr12_13717333	12	13717333	GRIN2B
chr12_13717456	12	13717456	GRIN2B
chr12_13719961	12	13719961	GRIN2B
chr12_13719988	12	13719988	GRIN2B
chr12_13720154	12	13720154	GRIN2B
chr12_13724756	12	13724756	GRIN2B
chr12_13724832	12	13724832	GRIN2B
chr12_13761542	12	13761542	GRIN2B
chr12_13768111	12	13768111	GRIN2B
chr12_13768474	12	13768474	GRIN2B
chr12_13768528	12	13768528	GRIN2B
chr12_13768544	12	13768544	GRIN2B
chr12_13769532	12	13769532	GRIN2B
chr12_13769544	12	13769544	GRIN2B
exm986601	12	13769570	GRIN2B
chr12_13769573	12	13769573	GRIN2B
chr12_13769585	12	13769585	GRIN2B
chr12_13828699	12	13828699	GRIN2B
chr12_13828723	12	13828723	GRIN2B
chr12_13906279	12	13906279	GRIN2B
chr12_13906282	12	13906282	GRIN2B
chr12_13906298	12	13906298	GRIN2B
chr12_13906333	12	13906333	GRIN2B
chr12_13906561	12	13906561	GRIN2B
chr12_13906565	12	13906565	GRIN2B
chr12_14018866	12	14018866	GRIN2B
chr12_14018885	12	14018885	GRIN2B
chr12_14018908	12	14018908	GRIN2B
chr12_14018977	12	14018977	GRIN2B
chr12_14018992	12	14018992	GRIN2B
chr12_14019096	12	14019096	GRIN2B
chr12_14019104	12	14019104	GRIN2B
exm988726	12	21015348	SLCO1B3
exm988736	12	21015706	SLCO1B3
variant.23573	12	21028167	SLCO1B3
exm988776	12	21032486	SLCO1B3
indel.23583	12	21033857	SLCO1B3
variant.23591	12	21068936	SLCO1B3
SNP61	12	21325716	SLCO1B1
rs2306282	12	21329802	SLCO1B1
kgp19079479	12	21331891	SLCO1B1
exm988956	12	21331891	SLCO1B1
kgp18791022	12	21358965	SLCO1B1
exm989023	12	21358965	SLCO1B1
SNP110	12	21392011	SLCO1B1
SNP130	12	21392047	SLCO1B1
kgp27640052	12	21392451	SLCO1B1
kgp27527741	12	21417922	SLCO1A2
kgp27523304	12	21418037	SLCO1A2
rs2219790	12	21418125	SLCO1A2
indel.23618	12	21422592	SLCO1A2
newrs3830207	12	21427459	SLCO1A2
exm989075	12	21445129	SLCO1A2
exm989084	12	21446935	SLCO1A2
exm989087	12	21446969	SLCO1A2
exm989102	12	21450445	SLCO1A2
exm1763152	12	21454123	SLCO1A2
exm1763156	12	21467546	SLCO1A2
exm989160	12	21526305	SLCO1A2
exm989171	12	21531247	SLCO1A2
indel.24341	12	48238575	VDR
exm997643	12	48240126	VDR
indel.25952	12	69756638	YEATS4
exm1025807	12	89995138	ATP2B1
exm2251243	12	90010713	ATP2B1
variant.26591	12	99638130	ANKS1B
exm1028807	12	99638164	ANKS1B
indel.26597	12	100042299	ANKS1B
exm2219698	12	100042340	ANKS1B
indel.26601	12	100042452	ANKS1B
variant.26603	12	100200182	ANKS1B
variant.28873	13	28588696	FLT3
exm1059960	13	28599075	FLT3
exm1068178	13	48615067	NUDT15
indel.29454	13	48615239	NUDT15
rs1059754	13	95672478	ABCC4
kgp411550	13	95673699	ABCC4
rs11568688	13	95673866	ABCC4
exm1074723	13	95727686	ABCC4
exm2251597	13	95822873	ABCC4
exm1074823	13	95860075	ABCC4
rs11568674	13	95861756	ABCC4
exm1074835	13	95861793	ABCC4
exm1074845	13	95863016	ABCC4
variant.30012	13	95886862	ABCC4
rs4148460	13	95886884	ABCC4
exm2221874	13	95899303	ABCC4
exm1093420	14	24761467	DHRS1
exm1106148	14	62194352	HIF1A
exm1106187	14	62207708	HIF1A
exm1147969	15	40246149	EIF2AK4
exm2274739	15	40265116	EIF2AK4
variant.34580	15	40284435	EIF2AK4
variant.34581	15	40285004	EIF2AK4
exm1148074	15	40294963	EIF2AK4
exm1148084	15	40300245	EIF2AK4
exm1148106	15	40311343	EIF2AK4
variant.35738	15	51504548	CYP19A1
exm1161553	15	51507335	CYP19A1
exm1161560	15	51507935	CYP19A1
exm1165171	15	58256261	ALDH1A2
rs4474631	15	58285179	ALDH1A2
exm2223557	15	58306448	ALDH1A2
kgp19982895	15	75012287	CYP1A1
exm2223805	15	75012894	CYP1A1
exm1839877	15	75013005	CYP1A1
indel.36753	15	75013064	CYP1A1
variant.36760	15	75014696	CYP1A1
exm1176905	15	75014921	CYP1A1
exm1176941	15	75042087	CYP1A2
exm1176946	15	75042153	CYP1A2
exm1176954	15	75042273	CYP1A2
exm1176994	15	75043592	CYP1A2
rs28399418	15	75043638	CYP1A2
exm1180550	15	78873272	CHRNA5
exm1841160	15	78882331	CHRNA5
1KG_15_78882503	15	78882503	CHRNA5
exm1180585	15	78882694	CHRNA5
exm1180592	15	78882797	CHRNA5
var_15_78894075	15	78894076	CHRNA3
exm1226068	16	23379203	SCNN1B
exm1226105	16	23388543	SCNN1B
exm1226107	16	23388679	SCNN1B
exm1229811	16	28603736	SULT1A2
exm1229812	16	28603757	SULT1A2
exm1229928	16	28618332	SULT1A1
exm1230356	16	28883975	SH2B1
exm1856270	16	31104713	VKORC1
exm1241582	16	55844909	CES1
exm1241620	16	55853502	CES1
variant.41078	16	56906261	SLC12A3
exm1242669	16	56913080	SLC12A3
exm1242705	16	56916340	SLC12A3
exm1242710	16	56917987	SLC12A3
exm1242716	16	56918033	SLC12A3
exm1242834	16	56947181	SLC12A3
exm1242903	16	56995908	CETP
exm1242919	16	56997025	CETP
variant.41148	16	57015557	CETP
exm1243004	16	57017292	CETP
newrs2303790	16	57017292	CETP
exm1253079	16	69745126	NQO1
exm1253094	16	69748928	NQO1
exm1253098	16	69752058	NQO1
exm1282045	17	4835991	GP1BA
indel.43648	17	4836518	GP1BA
1KG_17_4836675	17	4836675	GP1BA
exm1282075	17	4836753	GP1BA
indel.43649	17	4836909	GP1BA
variant.44087	17	7399665	POLR2A
exm2253226	17	7416512	POLR2A
exm1288597	17	7577577	TP53
exm1308756	17	28530193	SLC6A4
exm1308776	17	28537589	SLC6A4
exm2252925	17	28543148	SLC6A4
exm1308801	17	28543148	SLC6A4
exm2226030	17	28548655	SLC6A4
exm1308829	17	28548843	SLC6A4
exm1318658	17	38555150	TOP2A
exm2226669	17	48263326	COL1A1
exm2253061	17	48270364	COL1A1
exm1344007	17	61556415	ACE
exm1344011	17	61556453	ACE
exm1344041	17	61558467	ACE
exm1344071	17	61559883	ACE
exm1344092	17	61560500	ACE
exm1344136	17	61562654	ACE
exm2226934	17	61566335	ACE
exm1344217	17	61570929	ACE
exm1344241	17	61573804	ACE
variant.48038	17	64492401	PRKCA
indel.48039	17	64637584	PRKCA
exm1347153	17	64683255	PRKCA
rs11540152	18	662215	TYMS
1KG_18_55833055	18	55833055	NEDD4L
variant.50753	18	56016797	NEDD4L
variant.50808	18	58038700	MC4R
variant.50809	18	58038745	MC4R
exm1389708	18	58038864	MC4R
exm1389710	18	58038906	MC4R
exm1389727	18	58039173	MC4R
variant.50818	18	58039377	MC4R
variant.50820	18	58039422	MC4R
exm1389741	18	58039473	MC4R
exm1390205	18	60029014	TNFRSF11A
indel.53453	19	13395972	CACNA1A
exm1433059	19	13409946	CACNA1A
exm1433127	19	13476282	CACNA1A
indel.53772	19	16000398	CYP4F2
exm1438811	19	16000481	CYP4F2
newrs147723844	19	38945887	RYR1
exm1462668	19	38945887	RYR1
exm1462708	19	38949893	RYR1
exm1462752	19	38954471	RYR1
exm1935685	19	38959687	RYR1
exm1462945	19	38981268	RYR1
exm1463044	19	38993163	RYR1
exm1463103	19	38996459	RYR1
exm1463152	19	39002893	RYR1
exm1463181	19	39006807	RYR1
exm1463187	19	39008026	RYR1
exm1463190	19	39008109	RYR1
exm1463308	19	39033988	RYR1
exm1463334	19	39038965	RYR1
exm1463335	19	39038981	RYR1
exm1463383	19	39057590	RYR1
exm1463394	19	39058445	RYR1
exm1463432	19	39068843	RYR1
exm2276640	19	41351935	CYP2A6
kgp21326314	19	41512877	CYP2B6
kgp21492473	19	41512950	CYP2B6
exm1470216	19	41515943	CYP2B6
exm1470223	19	41518205	CYP2B6
exm1470229	19	41518261	CYP2B6
exm1938498	19	41518376	CYP2B6
indel.55888	19	41518677	CYP2B6
kgp29561741	19	41522591	CYP2B6
rs429358	19	45411941	APOE
exm1480799	19	45912425	CD3EAP
exm1480801	19	45912434	CD3EAP
exm1480807	19	45912497	CD3EAP
indel.56623	19	45920127	ERCC1
kgp14160575	2	38295598	CYP1B1
kgp14646680	2	38298105	CYP1B1
exm194002	2	54365802	ACYP2
exm194067	2	54483072	ACYP2
exm194087	2	54483287	ACYP2
exm207280	2	85777861	GGCX
variant.61740	2	85778949	GGCX
exm207293	2	85779046	GGCX
exm207336	2	85781322	GGCX
exm207352	2	85785573	GGCX
exm207364	2	85788015	GGCX
exm221860	2	113537190	IL1A
exm221878	2	113540315	IL1A
newrs146386766	2	113540343	IL1A
exm234939	2	160005754	TANC1
exm234950	2	160006983	TANC1
exm234994	2	160028700	TANC1
seq_chr2_160035374	2	160035374	TANC1
seq_chr2_160035676	2	160035676	TANC1
exm235050	2	160050798	TANC1
seq_chr2_160076262	2	160076262	TANC1
exm235107	2	160076262	TANC1
seq_chr2_160084340	2	160084340	TANC1
exm235145	2	160086101	TANC1
indel.63376	2	160086104	TANC1
exm235191	2	160086961	TANC1
exm235219	2	160087449	TANC1
exm237751	2	166152433	SCN2A
chr2_166152439	2	166152439	SCN2A
chr2_166152500	2	166152500	SCN2A
chr2_166152598	2	166152598	SCN2A
chr2_166153614	2	166153614	SCN2A
chr2_166164400	2	166164400	SCN2A
chr2_166165239	2	166165239	SCN2A
chr2_166165280	2	166165280	SCN2A
chr2_166166909	2	166166909	SCN2A
chr2_166166971	2	166166971	SCN2A
chr2_166166978	2	166166978	SCN2A
chr2_166168578	2	166168578	SCN2A
chr2_166170136	2	166170136	SCN2A
chr2_166170154	2	166170154	SCN2A
chr2_166170254	2	166170254	SCN2A
chr2_166170467	2	166170467	SCN2A
chr2_166170547	2	166170547	SCN2A
chr2_166170559	2	166170559	SCN2A
chr2_166170593	2	166170593	SCN2A
chr2_166172107	2	166172107	SCN2A
chr2_166172110	2	166172110	SCN2A
chr2_166172161	2	166172161	SCN2A
chr2_166172197	2	166172197	SCN2A
chr2_166172248	2	166172248	SCN2A
chr2_166179702	2	166179702	SCN2A
chr2_166179735	2	166179735	SCN2A
chr2_166179816	2	166179816	SCN2A
chr2_166179840	2	166179840	SCN2A
chr2_166183392	2	166183392	SCN2A
chr2_166183419	2	166183419	SCN2A
chr2_166183429	2	166183429	SCN2A
chr2_166187898	2	166187898	SCN2A
chr2_166201224	2	166201224	SCN2A
chr2_166201232	2	166201232	SCN2A
chr2_166201239	2	166201239	SCN2A
chr2_166201256	2	166201256	SCN2A
chr2_166201322	2	166201322	SCN2A
chr2_166201330	2	166201330	SCN2A
chr2_166210718	2	166210718	SCN2A
chr2_166210724	2	166210724	SCN2A
chr2_166210730	2	166210730	SCN2A
chr2_166210837	2	166210837	SCN2A
chr2_166210960	2	166210960	SCN2A
chr2_166210969	2	166210969	SCN2A
chr2_166210987	2	166210987	SCN2A
chr2_166221653	2	166221653	SCN2A
chr2_166221725	2	166221725	SCN2A
exm237838	2	166221738	SCN2A
chr2_166223731	2	166223731	SCN2A
chr2_166223738	2	166223738	SCN2A
chr2_166223744	2	166223744	SCN2A
chr2_166223749	2	166223749	SCN2A
chr2_166223752	2	166223752	SCN2A
chr2_166229801	2	166229801	SCN2A
chr2_166229810	2	166229810	SCN2A
chr2_166229828	2	166229828	SCN2A
chr2_166237642	2	166237642	SCN2A
chr2_166243438	2	166243438	SCN2A
chr2_166245509	2	166245509	SCN2A
exm237877	2	166245524	SCN2A
chr2_166245554	2	166245554	SCN2A
chr2_166245765	2	166245765	SCN2A
chr2_166245984	2	166245984	SCN2A
chr2_166246017	2	166246017	SCN2A
chr2_166246078	2	166246078	SCN2A
chr2_166246113	2	166246113	SCN2A
chr2_166246116	2	166246116	SCN2A
chr2_166246122	2	166246122	SCN2A
chr2_166246128	2	166246128	SCN2A
chr2_166246136	2	166246136	SCN2A
chr2_166246152	2	166246152	SCN2A
chr2_166246155	2	166246155	SCN2A
chr2_166847766	2	166847766	LOC102724058
chr2_166847839	2	166847839	LOC102724058
chr2_166847898	2	166847898	LOC102724058
chr2_166847943	2	166847943	LOC102724058
chr2_166848006	2	166848006	LOC102724058
chr2_166848087	2	166848087	LOC102724058
chr2_166848249	2	166848249	LOC102724058
chr2_166848345	2	166848345	LOC102724058
1KG_2_166848513	2	166848513	LOC102724058
chr2_166848517	2	166848517	LOC102724058
chr2_166848562	2	166848562	LOC102724058
chr2_166850744	2	166850744	LOC102724058
chr2_166850852	2	166850852	LOC102724058
chr2_166859138	2	166859138	LOC102724058
chr2_166859204	2	166859204	LOC102724058
chr2_166866276	2	166866276	LOC102724058
chr2_166870337	2	166870337	LOC102724058
chr2_166870361	2	166870361	LOC102724058
chr2_166870383	2	166870383	LOC102724058
chr2_166870386	2	166870386	LOC102724058
chr2_166870391	2	166870391	LOC102724058
chr2_166870397	2	166870397	LOC102724058
chr2_166870404	2	166870404	LOC102724058
chr2_166872237	2	166872237	LOC102724058
chr2_166892815	2	166892815	LOC102724058
exm238369	2	166892886	LOC102724058
chr2_166892905	2	166892905	LOC102724058
chr2_166893018	2	166893018	SCN1A
chr2_166894355	2	166894355	SCN1A
chr2_166894385	2	166894385	SCN1A
chr2_166894451	2	166894451	SCN1A
chr2_166894468	2	166894468	SCN1A
chr2_166894475	2	166894475	SCN1A
chr2_166894483	2	166894483	SCN1A
chr2_166894542	2	166894542	SCN1A
chr2_166894591	2	166894591	SCN1A
chr2_166894630	2	166894630	SCN1A
chr2_166895934	2	166895934	SCN1A
chr2_166897945	2	166897945	SCN1A
chr2_166898904	2	166898904	SCN1A
chr2_166898910	2	166898910	SCN1A
chr2_166900373	2	166900373	SCN1A
chr2_166900388	2	166900388	SCN1A
chr2_166900427	2	166900427	SCN1A
chr2_166900490	2	166900490	SCN1A
chr2_166900511	2	166900511	SCN1A
chr2_166901587	2	166901587	SCN1A
chr2_166901621	2	166901621	SCN1A
exm1988809	2	166901716	SCN1A
chr2_166901723	2	166901723	SCN1A
chr2_166901726	2	166901726	SCN1A
chr2_166901741	2	166901741	SCN1A
chr2_166901804	2	166901804	SCN1A
chr2_166903431	2	166903431	SCN1A
chr2_166904189	2	166904189	SCN1A
chr2_166904254	2	166904254	SCN1A
chr2_166904272	2	166904272	SCN1A
chr2_166905416	2	166905416	SCN1A
chr2_166908229	2	166908229	SCN1A
chr2_166908333	2	166908333	SCN1A
chr2_166908362	2	166908362	SCN1A
chr2_166908422	2	166908422	SCN1A
chr2_166908457	2	166908457	SCN1A
chr2_166908460	2	166908460	SCN1A
chr2_166909401	2	166909401	SCN1A
chr2_166911213	2	166911213	SCN1A
chr2_166912968	2	166912968	SCN1A
chr2_166929968	2	166929968	SCN1A
exm238470	2	166930064	SCN1A
exm260266	2	208420462	CREB1
indel.65316	2	216177346	ATIC
variant.65319	2	216189962	ATIC
exm263054	2	216190791	ATIC
exm263065	2	216191586	ATIC
exm263110	2	216211571	ATIC
exm263116	2	216211627	ATIC
indel.65326	2	216213961	ATIC
exm1997060	2	216214350	ATIC
rs1126792	2	234526680	UGT1A8
exm276950	2	234526694	UGT1A8
exm276972	2	234527015	UGT1A8
indel.66221	2	234527026	UGT1A8
kgp24613073	2	234545440	UGT1A8
exm277037	2	234545826	UGT1A8
newrs61748821	2	234545928	UGT1A8
exm277086	2	234581080	UGT1A8
exm2007968	2	234581200	UGT1A8
rs17868324	2	234590975	UGT1A8
variant.66236	2	234591047	UGT1A8
exm277158	2	234591352	UGT1A8
indel.66240	2	234591352	UGT1A8
exm277169	2	234601774	UGT1A8
kgp24130008	2	234627718	UGT1A8
newrs61764029	2	234638205	UGT1A8
rs17862879	2	234662986	UGT1A8
exm277474	2	234669100	UGT1A8
exm277479	2	234669259	UGT1A8
exm277485	2	234669576	UGT1A8
newrs35003977	2	234669607	UGT1A8
exm277486	2	234669607	UGT1A8
SNP126	2	234676880	UGT1A8
exm2237316	2	234681059	UGT1A8
rs1042710	2	234681208	UGT1A8
kgp14401070	2	234681624	UGT1A8
exm1521346	20	3193848	ITPA
variant.66957	20	3195925	ITPA
exm1521367	20	3199264	ITPA
indel.69699	21	37518414	CBR3-AS1
exm1585766	22	19868153	TXNRD2
exm1585784	22	19870918	TXNRD2
exm1585822	22	19898951	TXNRD2
exm1999586	22	19951119	COMT
newrs143374533	22	24698357	SPECC1L-ADORA2A
exm1594368	22	24717444	SPECC1L-ADORA2A
exm1594376	22	24717619	SPECC1L-ADORA2A
exm1594388	22	24717820	SPECC1L-ADORA2A
exm2002886	22	24717843	SPECC1L-ADORA2A
exm1594455	22	24761467	SPECC1L-ADORA2A
exm1613684	22	42523975	LOC101929829
var_22_44328756	22	44328756	PNPLA3
exm1615912	22	44328798	PNPLA3
exm1615918	22	44328917	PNPLA3
exm1615919	22	44328930	PNPLA3
exm2238725	3	14199767	XPC
exm292555	3	14206958	XPC
exm2040097	3	14208697	XPC
exm292559	3	14208716	XPC
exm292572	3	14214475	XPC
exm292577	3	14220032	XPC
newrs121917890	3	124454069	UMPS
exm345032	3	124458902	UMPS
exm345037	3	124459005	UMPS
exm2035881	3	124462785	UMPS
exm2035882	3	124462804	UMPS
exm345587	3	124854539	SLC12A8
kgp26960091	3	133652224	SLCO2A1
exm352382	3	133657306	SLCO2A1
exm352404	3	133664040	SLCO2A1
indel.77635	3	133666102	SLCO2A1
seq_chr4_2906502	4	2906502	ADD1
variant.79877	4	2928367	ADD1
seq_chr4_2930222	4	2930222	ADD1
kgp29060528	4	69536163	UGT2B15
indel.81195	4	69696540	UGT2B10
kgp21241543	4	69696568	UGT2B10
kgp20995559	4	70454724	UGT2A1
indel.81238	4	70455310	UGT2A1
indel.81242	4	70460333	UGT2A1
indel.81248	4	70462032	UGT2A1
exm403629	4	70504722	UGT2A1
exm403639	4	70504993	UGT2A1
exm403684	4	70513139	UGT2A1
indel.81259	4	70513146	UGT2A1
exm403696	4	70513361	UGT2A1
indel.81786	4	84200127	COQ2
rs9282571	4	89016698	ABCG2
exm412786	4	89018628	ABCG2
exm2241428	4	89020503	ABCG2
variant.81966	4	89020602	ABCG2
exm412814	4	89036115	ABCG2
exm2081802	4	89036155	ABCG2
rs3116448	4	89039360	ABCG2
rs1061018	4	89042853	ABCG2
rs12721643	4	89042860	ABCG2
exm2274035	4	89052361	ABCG2
exm412860	4	89053780	ABCG2
exm415183	4	100239268	ADH1B
GA004166	4	100242557	ADH1B
exm418722	4	110834537	EGF
variant.82405	4	110866227	EGF
variant.82413	4	110901300	EGF
exm418820	4	110901983	EGF
exm443905	5	7875470	MTRR
exm443938	5	7883356	MTRR
exm443944	5	7885868	MTRR
exm444005	5	7900056	MTRR
exm444834	5	13716796	DNAH5
exm461466	5	74638536	HMGCR
exm461475	5	74645921	HMGCR
exm461483	5	74646765	HMGCR
kgp30363566	5	74656405	HMGCR
rs11568508	5	131679531	SLC22A4
variant.86356	5	131714068	SLC22A5
kgp22482284	5	131719870	SLC22A5
exm476732	5	131719870	SLC22A5
rs2405518	5	131719906	SLC22A5
variant.86367	5	131726380	SLC22A5
exm476767	5	131726471	SLC22A5
rs11568521	5	131729439	SLC22A5
rs28383482	5	131729485	SLC22A5
rs11568524	5	131729878	SLC22A5
exm493194	5	148206954	ADRB2
exm500166	5	158745844	IL12B
indel.87814	5	158749498	IL12B
variant.88601	6	2838783	SERPINB1
exm512943	6	2895666	LOC101927730
exm513005	6	2954832	SERPINB6
exm513020	6	2959467	SERPINB6
exm2243770	6	3106044	RIPK1
exm513168	6	3106237	RIPK1
exm2257741	6	3113381	RIPK1
exm513209	6	3127517	BPHL
exm513210	6	3127518	BPHL
indel.88628	6	4056818	PRPF4B
kgp26133199	6	18129421	TPMT
variant.88952	6	18131003	TPMT
newrs72556347	6	18132367	TPMT
exm530271	6	31238253	HLA-C
exm530458	6	31322905	HLA-B
exm531315	6	31597512	PRRC2A
indel.89783	6	31609092	BAG6
exm531577	6	31609166	BAG6
exm531651	6	31616491	BAG6
exm531652	6	31616506	BAG6
variant.89784	6	31617287	BAG6
indel.89863	6	31778266	HSPA1L
exm536186	6	32610423	HLA-DQA1
indel.90602	6	39328213	KIF6
exm544702	6	39328259	KIF6
variant.90883	6	43270391	SLC22A7
kgp26504953	6	110757156	SLC22A16
exm2108572	6	110760012	SLC22A16
newrs137900553	6	110777739	SLC22A16
exm571723	6	110777830	SLC22A16
exm584213	6	145956611	EPM2A
exm584215	6	146007324	EPM2A
exm584218	6	146007358	EPM2A
exm588862	6	154411284	OPRM1
exm588872	6	154412245	OPRM1
exm588900	6	154414496	OPRM1
exm591763	6	160176479	WTAP
exm591766	6	160176531	WTAP
exm592503	6	160543034	SLC22A1
exm592568	6	160557283	SLC22A1
exm592626	6	160579573	SLC22A1
rs17853948	6	160645833	SLC22A2
exm592690	6	160668329	SLC22A2
rs8177508	6	160677671	SLC22A2
rs8177509	6	160677683	SLC22A2
indel.93970	6	160857900	SLC22A3
kgp26476026	6	160872891	SLC22A3
exm2116050	6	160963839	LPA
exm592871	6	160968841	LPA
exm592887	6	160969546	LPA
exm2243443	6	161006114	LPA
exm592961	6	161010626	LPA
exm2257638	6	161010626	LPA
exm593074	6	161071476	LPA
exm612410	7	30695556	CRHR2
exm622023	7	55238226	EGFR
exm622036	7	55240692	EGFR
exm622122	7	55273144	EGFR
exm629826	7	80374451	SEMA3C
exm629838	7	80378255	SEMA3C
exm2246044	7	87135347	ABCB1
exm631742	7	87138758	ABCB1
kgp22759672	7	87144603	ABCB1
rs28381967	7	87160789	ABCB1
exm631781	7	87160789	ABCB1
rs2032581	7	87160810	ABCB1
exm2156260	7	87168609	ABCB1
exm631802	7	87174218	ABCB1
kgp300078	7	87179540	ABCB1
exm631868	7	87196200	ABCB1
exm631873	7	87214848	ABCB1
rs1202183	7	87214983	ABCB1
psy_rs112174094	7	87217060	ABCB1
rs28381804	7	87229452	ABCB1
exm631892	7	87280182	ABCB1
rs17161788	7	99245909	CYP3A5
exm2246192	7	99245974	CYP3A5
SNP117	7	99262860	CYP3A5
exm638635	7	99264299	CYP3A5
newrs55965422	7	99264573	CYP3A5
exm2158566	7	99264573	CYP3A5
exm638648	7	99270276	CYP3A5
SNP74	7	99270276	CYP3A5
rs4646441	7	99277538	CYP3A5
kgp23468856	7	99302889	CYP3A7-CYP3A51P
rs4646468	7	99303001	CYP3A7-CYP3A51P
exm638683	7	99306709	CYP3A7-CYP3A51P
exm638701	7	99312240	CYP3A7-CYP3A51P
exm638708	7	99313444	CYP3A7-CYP3A51P
kgp13735649	7	99355166	CYP3A4
kgp23339555	7	99355612	CYP3A4
indel.96901	7	99355774	CYP3A4
exm638752	7	99358581	CYP3A4
exm638777	7	99361626	CYP3A4
rs28371759	7	99361626	CYP3A4
rs3208363	7	99364798	CYP3A4
exm638786	7	99365983	CYP3A4
exm2274251	7	99367825	CYP3A4
rs3091339	7	99370245	CYP3A4
exm638808	7	99375669	CYP3A4
exm2137247	7	117171053	CFTR
var_7_117171171	7	117171171	CFTR
exm652243	7	117174330	CFTR
exm652253	7	117175339	CFTR
exm652254	7	117175372	CFTR
exm652267	7	117180186	CFTR
newrs75528968	7	117180230	CFTR
newrs141115171	7	117180264	CFTR
newrs139573311	7	117199525	CFTR
variant.97844	7	117199530	CFTR
exm652337	7	117227874	CFTR
exm652339	7	117227887	CFTR
variant.97867	7	117232128	CFTR
exm652361	7	117232300	CFTR
exm652380	7	117232642	CFTR
variant.97881	7	117232649	CFTR
exm652385	7	117234995	CFTR
newrs142773283	7	117243783	CFTR
exm652411	7	117243783	CFTR
newrs1800110	7	117243828	CFTR
exm652416	7	117243828	CFTR
variant.97903	7	117246755	CFTR
variant.97904	7	117246790	CFTR
variant.97908	7	117250631	CFTR
exm652428	7	117250664	CFTR
newrs144055758	7	117250679	CFTR
var_7_117254714	7	117254714	CFTR
newrs150326506	7	117267610	CFTR
newrs75647395	7	117267714	CFTR
var_7_117282489	7	117282489	CFTR
newrs146795445	7	117282649	CFTR
exm655906	7	128388756	CALU
kgp28731205	8	18248849	NAT2
exm685663	8	18257728	NAT2
exm685673	8	18257985	NAT2
exm685706	8	18258384	NAT2
exm691394	8	26722110	ADRA1A
exm713494	8	103250959	RRM2B
exm713497	8	103251007	RRM2B
exm717225	8	119936717	TNFRSF11B
newrs147655243	8	139647253	COL22A1
exm2163964	8	139688801	COL22A1
indel.102663	8	139712382	COL22A1
exm723207	8	139727972	COL22A1
exm723330	8	139833539	COL22A1
exm723362	8	139856350	COL22A1
kgp28598296	8	143992693	CYP11B2
rs5317	8	143993449	CYP11B2
exm736603	9	4561527	SLC1A1
indel.103389	9	4576750	SLC1A1
exm736664	9	4585394	SLC1A1
rs8187998	9	75516062	ALDH1A1
exm755117	9	75540493	ALDH1A1
exm755130	9	75543837	ALDH1A1
rs1049981	9	75543888	ALDH1A1
exm755135	9	75543928	ALDH1A1
rs11554426	9	75555116	ALDH1A1
exm758386	9	86893201	SLC28A3
exm758389	9	86894235	SLC28A3
exm758421	9	86903030	SLC28A3
exm758430	9	86905107	SLC28A3
exm758440	9	86907599	SLC28A3
exm758478	9	86920189	SLC28A3
exm758484	9	86924570	SLC28A3
indel.106054	9	125141121	PTGS1
exm778865	9	125141171	PTGS1
exm2248547	X	113965766	HTR2C
variant.108745	X	114082564	HTR2C
exm1653881	X	114141379	HTR2C
exm1653892	X	114141721	HTR2C
exm1653895	X	114141856	HTR2C
exm1666751	X	153762655	G6PD
VGXS34713	X	153764209	G6PD

## Sheet: Non-callfilter
SNV	Chr	Bp	Gene
exm-rs17375901	1	11852516	MTHFR
exm15296	1	11855248	MTHFR		SNV	Single-nucleotide variant/PsychArray code
exm38066	1	29189601	OPRD1		Chr	Chromosome
rs10493890	1	97588830	DPYD		Bp	Base pair based in hg19 coordinates.
rs10875062	1	97746924	DPYD		Gene	Annotated gene
rs10465748	1	97757424	DPYD
kgp9376732	1	97770920	DPYD
rs10875069	1	97793775	DPYD
rs12060391	1	98019997	DPYD
rs13375516	1	98126717	DPYD
rs1801266	1	98157332	DPYD
psy_rs139027552	1	98376461	DPYD
exm104580	1	154548331	CHRNB2
rs3811450	1	154551032	CHRNB2
exm117932	1	161479732	FCGR2A
exm136275	1	201022387	CACNA1S
exm136390	1	201044682	CACNA1S
chr1_201081369	1	201081369	CACNA1S
exm2232609	1	226026405	EPHX1
exm153020	1	226027029	EPHX1
psy_rs139287929	10	96527672	CYP2C19
rs9332220	10	96743943	CYP2C9
kgp9237233	10	96748893	CYP2C9
rs12240508	10	104939232	NT5C2
psy_rs149363415	10	104953044	NT5C2
exm855847	10	112838337	ADRA2A
exm920155	11	62752003	SLC22A6
rs11568479	11	62768242	SLC22A8
exm922986	11	64359419	SLC22A12
exm923010	11	64366298	SLC22A12
exm956252	11	113258719	ANKK1
exm956285	11	113265724	ANKK1
exm956336	11	113270024	ANKK1
exm956405	11	113283484	DRD2
rs2734833	11	113292920	DRD2
exm957700	11	116661665	APOA5
rs10790398	11	120551684	GRIK4
rs751368	11	120610584	GRIK4
exm963755	11	120833194	GRIK4
chr12_13716518	12	13716518	GRIN2B
chr12_13722821	12	13722821	GRIN2B
chr12_13724895	12	13724895	GRIN2B
chr12_13764763	12	13764763	GRIN2B
rs11055678	12	14056953	GRIN2B
rs2138334	12	20967283	SLCO1B3
rs981262	12	21312510	SLCO1B1
rs4149057	12	21331599	SLCO1B1
exm989006	12	21355489	SLCO1B1
rs4149085	12	21392290	SLCO1B1
rs11045927	12	21429069	SLCO1A2
rs4148987	12	21482481	SLCO1A2
rs10743413	12	21507074	SLCO1A2
kgp18707282	12	21527350	SLCO1A2
rs12016723	13	95731736	ABCC4
kgp19889819	15	75012644	CYP1A1
exm1176859	15	75012979	CYP1A1
exm1241669	16	55862691	CES1
exm1241692	16	55862883	CES1
exm1242903	16	56995908	CETP
exm1335493	17	48267454	COL1A1
exm1343993	17	61554664	ACE
exm1344120	17	61561867	ACE
exm1344245	17	61574215	ACE
rs973752	17	64428612	PRKCA
rs7210818	17	64764103	PRKCA
rs4528612	17	64773299	PRKCA
exm1388732	18	55711905	NEDD4L
rs158865	18	55903021	NEDD4L
rs7239275	18	56050868	NEDD4L
rs11085835	19	13332010	CACNA1A
rs1502017	19	13430324	CACNA1A
kgp21344969	19	16006323	CYP4F2
exm1462824	19	38964277	RYR1
rs16972639	19	38964525	RYR1
rs12979860	19	39738787	IFNL4
SNP40	19	41354171	CYP2A6
exm1475950	19	44047839	XRCC1
rs429358	19	45411941	APOE
exm1479364	19	45412040	APOE
exm1479365	19	45412056	APOE
exm1479366	19	45412079	APOE
rs7412	19	45412079	APOE
rs1052131	19	49102513	SULT2B1
kgp4128612	2	38296012	CYP1B1
rs2855658	2	38296890	CYP1B1
rs9341248	2	38301915	CYP1B1
exm187704	2	38302177	CYP1B1
exm187709	2	38302361	CYP1B1
exm187711	2	38302390	CYP1B1
rs10206954	2	54358517	ACYP2
exm194085	2	54483272	ACYP2
rs843748	2	54502912	ACYP2
rs6736704	2	166108771	SCN2A
rs7600082	2	166117860	SCN2A
chr2_166153614	2	166153614	SCN2A
chr2_166183491	2	166183491	SCN2A
chr2_166210724	2	166210724	SCN2A
chr2_166895980	2	166895980	SCN1A
chr2_166901696	2	166901696	SCN1A
rs1542484	2	166905375	SCN1A
rs881711	21	37507745	CBR3-AS1
GA017521	21	37507769	CBR3-AS1
rs11910763	21	37511627	CBR3-AS1
rs11541479	22	19906511	TXNRD2
rs174674	22	19934025	COMT
exm1615876	22	44319936	PNPLA3
exm2255737	3	14189426	XPC
rs2228000	3	14199887	XPC
rs581557	3	124871467	SLC12A8
rs587926	3	124883086	SLC12A8
rs569255	3	124925934	SLC12A8
rs4148304	4	70460328	UGT2A1
exm412870	4	89061114	ABCG2
rs7658584	4	89096641	ABCG2
rs16879305	5	7885526	MTRR
rs272873	5	131675408	SLC22A4
exm476714	5	131705800	SLC22A5
exm476782	5	131729368	SLC22A5
rs6910086	6	3287118	SLC22A23
exm2257740	6	31116210	CCHCR1
exm-rs1265112	6	31118019	CCHCR1
exm-rs3819299	6	31322367	HLA-B
exm530461	6	31322911	HLA-B
exm535959	6	32552039	HLA-DRB1
exm536110	6	32609323	HLA-DQA1
exm537542	6	33052736	HLA-DPB1
exm537555	6	33052981	HLA-DPB1
exm-rs9277489	6	33053942	HLA-DPB1
rs9479756	6	154410114	OPRM1
exm588851	6	154411124	OPRM1
rs5746134	6	160103115	SOD2
rs3818678	6	160577499	SLC22A1
rs17853948	6	160645833	SLC22A2
rs8187715	6	160769582	SLC22A3
rs2457577	6	160854138	SLC22A3
exm592854	6	160961137	LPA
rs7761377	6	161032481	LPA
rs11770506	7	55090379	EGFR
rs2017000	7	55242609	EGFR
psy_rs28364273	7	87133863	ABCB1
rs1002204	7	87141497	ABCB1
rs6961419	7	87172136	ABCB1
psy_rs112174094	7	87217060	ABCB1
rs6949974	7	117225159	CFTR
exm652329	7	117227792	CFTR
variant.97940	7	117282519	CFTR
rs1801280	8	18257854	NAT2
rs11135957	8	26652010	ADRA1A
indel.102657	8	139691859	COL22A1
rs9324493	8	139727981	COL22A1
rs7871253	9	75529423	ALDH1A1
rs12855702	X	113913719	HTR2C
rs2428720	X	113973626	HTR2C
VGXS34742	X	153761203	G6PD
exm1666732	X	153761240	G6PD
